# 1 **Passive epidemiological surveillance in wildlife in Costa Rica identifies pathogens**

## 2 **of zoonotic and conservation importance**

3 Fernando Aguilar-Vargas<sup>1-2†</sup>, Tamara Solorzano-Scott<sup>1†</sup>, Mario Baldi<sup>3</sup>, Elías Barquero-Calvo<sup>3-4</sup>, Ana Jiménez-  
4 Rocha<sup>5</sup>, Carlos Jiménez<sup>3-6</sup>, Marta Piche-Ovares<sup>6</sup>, Gaby Dolz<sup>7</sup>, Bernal León<sup>2</sup>, Eugenia Corrales-Aguilar<sup>8</sup>, Mario  
5 Santoro<sup>9</sup>, Alejandro Alfaro-Alarcón<sup>1\*</sup>

6 1. Departamento de Patología, Escuela de Medicina Veterinaria, Universidad Nacional, Costa Rica.

7 2. Servicio Nacional de Salud Animal, Ministerio de Agricultura y Ganadería, Costa Rica.

8 3. Programa de Investigación en Enfermedades Tropicales, Escuela de Medicina Veterinaria, Universidad  
9 Nacional, Costa Rica.

10 4. Laboratorio de bacteriología, Escuela de Medicina Veterinaria, Universidad Nacional, Costa Rica.

11 5. Laboratorio de Parasitología, Escuela de Medicina Veterinaria, Universidad Nacional, Costa Rica.

12 6. Departamento de Virología, Escuela de Medicina Veterinaria, Universidad Nacional, Costa Rica.

13 7. Laboratorio de Zoonosis y Entomología, Escuela de Medicina Veterinaria, Universidad Nacional, Costa  
14 Rica.

15 8. Virology-CIET (Research Center for Tropical Diseases), Faculty of Microbiology, Universidad de Costa  
16 Rica, Costa Rica.

17 9. Department of Integrative Marine Ecology, Stazione Zoologica Anton Dohrn, Italy.

18  
19  
20 † Contributed equally to this work: Fernando Aguilar-Vargas, Tamara Solorzano-Scott.

21 \* [alejandro.alfaro.alarcon@una.cr](mailto:alejandro.alfaro.alarcon@una.cr)

## 23 Abstract

24 Epidemiological surveillance systems for pathogens in wild species have been proposed as a preventive measure  
25 for epidemic events. These systems can minimize the detrimental effects of an outbreak, but most importantly,  
26 passive surveillance systems are the best adapted to countries with limited resources. Therefore, the present  
27 study aims to evaluate the technical and infrastructural feasibility to establish this type of scheme in Costa Rica  
28 targeting the detection of pathogens of zoonotic and conservation importance in wildlife. Between 2018 and  
29 2020, 85 carcasses of free-ranging vertebrates were admitted for post mortem analysis and complementary  
30 laboratory analysis, representing a solid basis for the implementation of a passive surveillance system for  
31 wildlife diseases in the country. However, we encounter during this research significant constraints that affected  
32 the availability of carcasses for analysis, mainly related to the initial identification of cases, detection biases  
33 towards events in populated- or easily accessible-areas with nearby located wildlife management centers,  
34 further associated with financial disincentives, and limited local logistics capacity. Thus resulting in the exclusion  
35 of some geographic regions of the country. This epidemiological surveillance scheme allowed us to estimate the  
36 general state of health of the country's wildlife, establishing the cause of death of the analyzed animals as  
37 follows: (i) 46 (54.1%) traumatic events, (ii) 23 (27.1%) infectious agents, (iii) two (2.4%) degenerative illness,  
38 (iv) three (3.5%) presumably poisoning, and (v) in 11 (12.9%) undetermined. It also allowed the detection of  
39 pathogens such as, canine distemper virus, *Klebsiella pneumoniae*, *Toxoplasma gondii*, *Trypanosoma* spp.,  
40 *Angiostrongylus* spp., *Dirofilaria* spp., *Baylisascaris* spp., among others. As well as recognizing the circulation of  
41 these pathogens around national territory and also on those analyzed species. This strategy is crucial in  
42 geographical regions defined as critical for the appearance of diseases due to their great biodiversity and social  
43 conditions.

## 46 Introduction

47 Zoonotic diseases represent one of the major burdens to society (both locally and globally), and a direct threat  
48 to public health, conservation, and human welfare programs [1,2]. Moreover, zoonotic diseases are responsible  
49 for causing significant economic losses, distorting social patterns, and negatively impacting human development  
50 indices, with a strong impact on developing countries [3–6]. A current example is the COVID-19 pandemic, that  
51 evidences the inadequacy of the infrastructures and diagnostic facilities/techniques to ensure surveillance, for  
52 early detection of potentially zoonotic agents in wildlife and for establishing control measures and mitigation  
53 [7].

54 Wildlife populations act as reservoirs for numerous pathogens, many of which can affect both human and animal  
55 health though with different degrees. Wildlife play various roles within the epidemiology of diseases  
56 participating in their spread and maintenance [8–10]. These roles assign wildlife the important function of  
57 sentinels of the ecosystems' health, and allows the early detection of alterations in the environment; as well as,  
58 the distribution, the re-emergence or emergence of certain pathogens in a specific region [11,12].

59 Tropical countries (including Costa Rica) are among the areas of most extraordinary natural diversity with  
60 concomitant high diversity of pathogens and thus, a high potential for disease emergence [13,14]. The risk posed  
61 by wildlife as possible natural reservoirs, especially in geographic regions such as Costa Rica, a crossing point  
62 between North America and South America, is stressed by migratory movements that influence the appearance  
63 of diseases [15,16]. This risk has increased drastically because of anthropogenic pressures linked to over-  
64 exploitation of natural resources and increase of land use that in turn increases the possibility of contact  
65 between wildlife, domestic animals, and humans [17,18].

66 One of the preventive strategies against the risk of epidemic events, promoted by the World Organization for  
67 Animal Health (OIE) and World Health Organization (WHO) is to increase the efforts to establish early detection  
68 mechanisms for pathogens, of both zoonotic and conservation importance, via epidemiological monitoring  
69 systems, and emphasizing the need to develop robust surveillance and control programs for diseases in free-

70 ranging species [7,19,20]. As early as 2012, the World Bank stated that preventive investments in the "ONE  
71 HEALTH" approach through veterinary and public health services could mean significant savings in response to  
72 the zoonotic outbreaks the world faces annually [21]. This statement reinforces the idea that investment in  
73 programs of epidemiological surveillance using wildlife as sentinels may be an alternative measure to prevent  
74 or predict epidemic events, which could minimize the economic impact of an outbreak.

75 One of the first steps to know the health status of the wildlife in a region is monitoring through passive  
76 surveillance, which identifies the causes of morbidity and mortality in a range of species based on their  
77 pathological profiles through post-mortem examinations. This approach offers advantages such as profitability  
78 and the ability to carry out a convenience sampling by taking advantage of the established infrastructure and  
79 obtaining a sustainable tool that allows understanding the emerging potential of different pathogens.  
80 Furthermore, when these schemes are set in the long term, it has been proven to provide the core information  
81 for decision-making and policies, regulations, and strategies establishment, prioritizing disease prevention, even  
82 when the sampling is biased and with incomplete geographic coverage [22–25].

83 Significant efforts have been made in Latin American to improve epidemiological surveillance systems aimed at  
84 animal health, however, there is still the need to optimize these schemes [26,27]. For example, according to the  
85 U.S. Department of Agriculture, Costa Rica has the infrastructure and maintains adequate surveillance programs  
86 to detect and control zoonotic diseases in farm animals [28]. However, it does not contemplate local wildlife  
87 within its scheme as it should be [29].

88 Several pathogens such as zoonotic parasites, vector-borne diseases, and direct transmission viruses have been  
89 identified in Costa Rican wildlife [30–41]. Nonetheless, without being contemplated in a routine systematic  
90 wildlife surveillance program, this information cannot reveal the local distribution of these infectious agents or  
91 the general health status of wildlife. And it only reflects the urgency of establishing a constant and sustainable

92 surveillance diseases system, where aspects such as the pathogens zoonotic in wildlife are contemplated, and  
93 open the door to further research to know the eco-epidemiology of these agents at the local level.

94 Countries with limited resources (LMIC) such as Costa Rica, face severe financial and logistical restrictions to  
95 monitor the health and circulation of pathogens in wildlife. Nevertheless, the animal health system should, in  
96 the short term, establish at least a passive epidemiological surveillance in wildlife. Therefore, during our  
97 research a pilot scheme for surveillance of the general health status of wildlife was implemented, aiming to  
98 evaluate the technical and infrastructural feasibility to establish sustainably of this type of scheme in Costa Rica.  
99 Eighty-five carcasses of wild species were analyzed, detecting zoonotic pathogens, such as *Klebsiella*  
100 *pneumoniae*, *Toxoplasma gondii*, *Baylisascaris spp.* and pathogens of conservation importance in wildlife, such  
101 as canine distemper virus, among others. Furthermore, our research allowed to know the circulating pathogens  
102 in the analyzed species and their distribution in the national territory. This demonstrated that there is the  
103 logistical capacity to implement this surveillance program even when we experience some limitations.

## 104 **Material and Methods**

### 105 **Statement of Ethics**

106 All samples were obtained from dead wildlife (found dead in the field or euthanized after veterinary care in  
107 specialized centers). The study was approved by the Ministry of Environment and Energy (MINAE) (wildlife  
108 authority) through permit (R-SINAC-PNI-ACLAC-039), and with the support of the animal health authority, the  
109 National Animal Health Service through the office (SENASA-DG-0277-18).

### 110 **Notification and reception of cases**

111 Between 2018 and 2020, officials from the wildlife management centers, veterinarians from the National Animal  
112 Health Service (SENASA), and wildlife officials from the National Wildlife Service (SINAC) reported cases, and  
113 voluntarily sent specimens from different localities in the country to the Wildlife Program of SENASA or directly

114 to Pathology Department of the Escuela de Medicina Veterinaria, Universidad Nacional. The carcasses used in  
115 this study were all from free-ranging vertebrates with any apparent clinical condition or after death due to any  
116 associated disease or trauma. Basic information was requested for every sample submission: geographic  
117 location, the standard and scientific name of the animal, clinical signs, and any information considered relevant  
118 to the case, following the scheme recommended by the OIE for the notification of cases for disease surveillance  
119 system in wild animals [20,42]. All carcasses were shipped fresh under refrigerated conditions or stored at -20  
120 °C for a maximum period of one week before shipping.

### 121 Pathological analysis

122 The carcasses received were classified by their autolysis degree according to an established scale of one to five  
123 [43]. Thus, ranging from a fresh carcass or recently dead animal (grade 1) to advanced decomposition (grade 4)  
124 and partial, mummified carcasses or skeletal remains (grade 5). Only carcasses with grades 1 to 3 were included  
125 in the study for post-mortem analysis and tissue sampling [44]. Therefore, 96 specimens were received, of  
126 which, 85 were admitted in the study. These were divided by taxonomic class into birds and mammals. The  
127 mammal class was subdivided into taxonomic groups. The geographical distribution and the taxa admitted are  
128 shown in S1 Fig.

129 All morphological findings were recorded. In addition, tissue samples were taken for routine histopathological  
130 and microbiological analysis as required. Tissue samples for histopathology were processed based on standard  
131 routing protocols [44].

### 132 Detection of different infectious agents

133 **Virus Detection:** Molecular methods were used for the detection of different viral agents. All molecular methods  
134 were done in the presence of a positive and a negative control. The samples analyzed were fresh tissues  
135 collected in a sterile manner during post-mortem analysis. In addition, we performed RNA extraction using the

136 commercial kit DNeasy Blood and Tissue (QIAGEN, Venlo, The Netherlands), following the manufacturer's  
 137 recommendations. The methods used and the samples collected are specified in Table 1.

138 **Protozoa Detection:** Confirmation was performed using molecular techniques for pathogen identification when  
 139 a previous presumptive protozoa presence was established in the histological study. All molecular methods  
 140 were done in the presence of a positive and a negative control. Tissue samples previously embedded in paraffin  
 141 were used for this purpose. The deparaffinization procedure was done using xylol washes following the method  
 142 recommended to perform DNA extraction from the tissue [45]. According to the manufacturer's instructions,  
 143 we performed DNA extraction using the commercial kit DNeasy Blood and Tissue (QIAGEN, Venlo, The  
 144 Netherlands). The methods used and the samples collected are specified in Table 1.

145 **Table 1. Molecular techniques for the detection of viral agents and protozoa.**

| Infectious agent                     | Target region                         | Method        | Primer        | Sequence                                              | Reference protocol                | Used material       |
|--------------------------------------|---------------------------------------|---------------|---------------|-------------------------------------------------------|-----------------------------------|---------------------|
| <b>Canine Distemper Virus (CDV).</b> | N gene                                | Nested RT-PCR | First round:  | 5'- ACT GCT CCT GAT ACT GC-                           | Da Budaszewski et al., 2014. [46] | Tissue <sup>a</sup> |
|                                      |                                       |               | CDV-1F        | 3'                                                    |                                   |                     |
|                                      |                                       |               | CDV-2R        | 5'- TTC AAC ACC RAC YCC C-3'                          |                                   |                     |
|                                      |                                       |               | Second round: | 5'- ACA GRA TTG CYG AGG                               |                                   |                     |
| CDV-3F                               | ACY TRT-3'                            |               |               |                                                       |                                   |                     |
| CDV-4R                               | 5'- CAR RAT AAC CAT GTA YGG<br>TGC-3' |               |               |                                                       |                                   |                     |
| <b>Alphaviruses.</b>                 | nsP4                                  | Nested RT-PCR | First round:  | 5'- TTT AAG TTT GGT GCG ATG                           | Grywna et al., 2010. [47]         | Tissue <sup>a</sup> |
|                                      |                                       |               | --            | ATG AAG TC-3' (500 nM)                                |                                   |                     |
|                                      |                                       |               |               | 5'- GCA TCT ATG ATA TTG ACT<br>TCC ATG TT-3' (500 nM) |                                   |                     |

|                                            |                 |                       |                         |                                                                                                                                                                                                   |                                                                                        |                     |
|--------------------------------------------|-----------------|-----------------------|-------------------------|---------------------------------------------------------------------------------------------------------------------------------------------------------------------------------------------------|----------------------------------------------------------------------------------------|---------------------|
|                                            |                 |                       | Second round:<br>--     | <i>5'-GGT GCG ATG ATG AAG TCT<br/>GGG ATG T-3' (200nM)</i><br><i>5'- CTA TGA TAT TGA CTT CCA<br/>TGT TCA TCC A-3' (100 nM)</i><br><i>5'-CTA TGA TAT TGA CTT CCA<br/>TGT TCA GCC A-3' (100 nM)</i> |                                                                                        |                     |
| <b>Flaviviruses.</b>                       | NS5 gene        | Semi-nested<br>RT-PCR | First round:            | <i>5'- AAC ATG ATG GGR AAR</i>                                                                                                                                                                    | Scaramozzino<br>et al., 2001.<br>[48]                                                  | Tissue <sup>a</sup> |
|                                            |                 |                       | MAMD                    | <i>AGR GAR AA-3'</i>                                                                                                                                                                              |                                                                                        |                     |
|                                            |                 |                       | cFD2                    | <i>5'-GTG TCC CAG CCG GCG<br/>GTG TCA TCA GC-3'</i>                                                                                                                                               |                                                                                        |                     |
|                                            |                 |                       | Second round:<br>FS 778 | <i>5'-AAR GGH AGY MCD GCH<br/>ATH TGG T-3'</i>                                                                                                                                                    |                                                                                        |                     |
|                                            |                 |                       | cFD2                    | <i>5'-GTG TCC CAG CCG GCG GTG<br/>TCA TCA GC-3'</i>                                                                                                                                               |                                                                                        |                     |
| <b>Avian<br/>Influenza<br/>virus (AI).</b> | matrix (M) gene | qRT-PCR               | M + 25                  | <i>5'-AGA TGA GTC TTC TAA CCG<br/>AGG TCG-3'</i>                                                                                                                                                  | Spackman et<br>al., 2002. [49]                                                         | Tissue <sup>b</sup> |
|                                            |                 |                       | M 124                   | <i>5'-TGC AAA AAC ATC TTC TTC<br/>AAG TCT CTG-3'</i>                                                                                                                                              |                                                                                        |                     |
|                                            |                 |                       | M + 64                  | <i>5'-FAM-TCA GGC CCC CTC AAA<br/>GCC GA-TAMRA-3'</i>                                                                                                                                             |                                                                                        |                     |
| <b>Rabies virus.</b>                       | Nucleoprotein   | RT-PCR                | RAB504                  | <i>5'-TAT ACT CGA ATC ATG AAT<br/>GGA GGT CGA CT-3'</i>                                                                                                                                           | Primers:<br>Oliveira et al.<br>2010. [50]<br>Protocol:<br>Carnieli et al.<br>2008 [51] | Tissue <sup>c</sup> |
|                                            |                 |                       | RAB304                  | <i>5'-ACG CTT AAC AAC AAR ATC<br/>ARA G-3'</i>                                                                                                                                                    |                                                                                        |                     |
| <b>Newcastle<br/>virus.</b>                | Fusion gene, F0 | RT-PCR                | NCD3                    | <i>5'-GTC AAC ATA TAC ACC TCA<br/>TC-3'</i>                                                                                                                                                       | STAUBER,<br>1995. [52]                                                                 | Tissue <sup>b</sup> |



|                                  |                          |            |                          |                                              |                                                                        |                   |
|----------------------------------|--------------------------|------------|--------------------------|----------------------------------------------|------------------------------------------------------------------------|-------------------|
|                                  |                          |            | NCD4                     | <i>5'-GGA GGA TGT TGG CAG<br/>CATT-3'</i>    |                                                                        |                   |
| <b><i>Toxoplasma gondii.</i></b> | 529bp repetitive segment | PCR        | Tox-8                    | <i>5'-CCC AGC TGC GTC TGT CGG<br/>GAT-3'</i> | Homan et al., 2000. [53]                                               | FFPE <sup>d</sup> |
|                                  |                          |            | Tox-11                   | <i>5'-GCG TCG TCT CGT CTA GAT<br/>CG-3'</i>  | Reischl et al., 2003. [54]                                             |                   |
| <b><i>Trypanosoma cruzi.</i></b> | 18S rRNA gene            | Nested PCR | First round:<br>SSU4_F   | <i>5'-GTG CCA GCA CCC GCG GTA<br/>AT-3'</i>  | First round primer:                                                    | FFPE <sup>e</sup> |
|                                  |                          |            | 18Sq1R                   | <i>5'-CCA CCG ACC AAA AGC GGC<br/>CA-3'</i>  | Pinto et al., 2015. [55]                                               |                   |
|                                  |                          |            | Second round:<br>SSU561F | <i>5'-TGG GAT AAC AAA GGA<br/>GCA-3'</i>     | Second round primer:                                                   |                   |
|                                  |                          |            | SSU561R                  | <i>5'-CTG AGA CTG TAA CCT CAA<br/>AGC-3'</i> | Noyes et al., 1999. [56]                                               |                   |
|                                  |                          |            |                          |                                              | Protocol:<br>Aleman et al., 2017. [57]<br>Murphy & O'Brien, 2007. [58] |                   |
| <b><i>Leishmania spp.</i></b>    | Kinetoplast              | PCR        | 13A                      | <i>5'- GTG GGG GAG GGG CGT<br/>TCT-3'</i>    | Medeiros et al. 2002. [59]                                             | FFPE <sup>f</sup> |
|                                  |                          |            | 13B                      | <i>5'-ATT TTA CAC CAA CCC CCA<br/>GTT-3'</i> | Sosa-Ochoa et al. 2015. [60]                                           |                   |

FFPE: formalin-fixed paraffin-embedded;

<sup>a</sup> brain and lung;

<sup>b</sup> Lung and Trachea and cloacal swab;

<sup>c</sup> hippocampus, cerebellum, and medulla oblongata;

<sup>d</sup> spleen, lung, and liver;

<sup>e</sup> heart;

<sup>f</sup> spleen

---

146

147 **Bacteriological detection:** Tissue samples from animals with inflammatory processes (suppurative or abscesses)  
148 were cultured following standard bacteriological procedures. For bacterial isolation, samples were inoculated  
149 on non-selective and selective agar media. Significant bacterial growth was identified using the automated  
150 VITEK-2 Compact system, software version 8.02 (bioMérieux, Marcy l'Etoile, France). VITEK test cards for Gram-  
151 negative [GN], Gram-positive [GP], and anaerobes [ANC] were used for identification according to the  
152 manufacturer's instructions.

153 **Parasites identification:** All parasites recovered from animals of the two investigated classes were washed with  
154 physiological saline, preserved in alcohol, acetic acid, and formalin (AFA) solution, and subjected to  
155 identification to genus level [61]. Physical and morphometric characteristics were recognized after fixation and  
156 clarification with Hoyer's solution [62–64]. In addition, processed cestodes were stained with dilute Harris'  
157 hematoxylin solution.

## 158 Geocoding and spatial analysis

159 Each case was geocoded using the latitude and longitude generated by GPS of the point where the specimen  
160 was found by field personnel. When the GPS was not available, they were geocoded using the latitude and  
161 longitude of the approximate location where they were found, and this was generated by Google Earth Pro v7.3  
162 (2021, Google Inc.). The georeferenced points of each sample admitted created a map using ArcGIS 10.7 (ERSI)  
163 (S1 Fig).

## 164 Results

## 165 Distribution of cases for age, sex, taxonomic classification and sender

166 Of the 85 specimens admitted to the study, there was an age distribution of 23 (27.1%) young animals and 62  
167 (72.9%) adults. The sex distribution was 48 (56.5%) males and 37 (43.5%) females. According to the taxonomic  
168 class, we received nine (10.5%) specimens of the birds and 76 (89.5%) of the mammals. The notification of cases  
169 was made by SINAC and the Animal Health Service SENASA, with 21 (24.7%) of the cases and 64 (75.3%) by  
170 wildlife rescue centers. The biological data of the admitted specimens are shown in S2 Table. Furthermore, cases  
171 of two mass fatality events were received. In the first case, field officials reported the death of hundreds of  
172 pelicans, of which we received two specimens and they were found positive for flaviviruses. The second case  
173 was the death of several carnivores who tested positive for the canine distemper virus.

## 174 Distribution of causes of death and injuries according to etiology

175 The distribution of the presumptive cause of death according pathological findings corresponded to 46 (54.1%)  
176 associated with traumatic events (mainly roadkill and electrocution), 23 (27.1%) with fatalities directly related  
177 to infectious agents, and 2 (2.4%) with degenerative disease. Additionally, in 3 (3.5%) cases, the death was  
178 presumptively associated with intoxication, and in 11 (12.9%), the cause of death was not determined. Of the  
179 individuals with a cause of traumatic death, 31 (67.4%) concomitantly presented lesions associated with an  
180 infectious etiology (24 with parasites, three with bacteria, one with protozoa and four with multiple  
181 microorganisms). Of the specimens with an infectious cause of death, ten presented lesions associated with  
182 viruses, five with parasites, two with protozoa, one with bacteria, and five presented lesions associated with  
183 multiple etiologies.

184 Of the identified lesions by analyzed organs (gross and microscopic injuries), 199 (74.8%) were associated with  
185 infectious processes, and 67 (25.2%) were associated with non-infectious processes (46 traumatic, five toxic,  
186 four degenerative diseases, and twelve non-relevant focal lesions). According to the predominant inflammatory  
187 infiltrate of the infectious processes, presumptively 69 (34.7%) lesions were associated with protozoa and

188 parasites (histiocytic and eosinophilic infiltrate, respectively), 55 (27.6%) were linked with viral infections  
 189 (lymphoplasmacytic infiltrate), and 36 (18.1%) were related to bacterial processes (suppurative infiltrate).  
 190 Examples of these inflammatory lesions is observed in Fig 1 (see legend). In 39 lesions, the infectious etiology  
 191 was not investigated because they were considered non-relevant focal lesions. The distribution of lesions  
 192 identified by taxon and etiology are described in Table 2. The description of the pathological findings identified  
 193 by species is detailed in S2 Table.

194 Of the lesions associated with infectious etiology, in 44 (22.1%), the causal agent was not possible to be  
 195 determined. In 21 of these lesions, a predominantly lymphoplasmacytic inflammatory infiltrate was observed,  
 196 suggestive of viral etiology (11 pneumonia, five hepatitis, four encephalitis). In 18 lesions, the inflammatory  
 197 infiltrate was suppurative, suggestive of bacterial etiology (five pneumonia, four nephritis, four myositis, one  
 198 dermatitis). Five lesions had a predominantly histiocytic infiltrate suggestive of the presence of protozoa (n=2  
 199 hepatitis, n=2 colitis, n=1 splenitis). All parasites associated with lesions were identified in the complementary  
 200 analysis.

201 **Table 2. Main morphological diagnoses identified in free-ranging wild animals analyzed in the years 2018-**  
 202 **2020.**

| Cause of morbidity<br>or mortality | Taxa    |           |        |           |          |          |           |       | Total      |
|------------------------------------|---------|-----------|--------|-----------|----------|----------|-----------|-------|------------|
|                                    | Primate | Carnivora | Pilosa | Marsupial | Rodentia | Ungulate | Cingulate | Bird  |            |
|                                    | (n=25)  | (n=25)    | (n=11) | (n=5)     | (n=4)    | (n=4)    | (n=2)     | (n=9) |            |
| <b>Infectious<sup>1</sup></b>      |         |           |        |           |          |          |           |       | <b>199</b> |
| <b>Viral</b>                       |         |           |        |           |          |          |           |       | <b>55</b>  |
| Meningoencephalitis                | 1       | 12        | 0      | 0         | 1        | 0        | 0         | 0     | 14         |
| Pneumonia                          | 4       | 12        | 1      | 3         | 1        | 0        | 0         | 3     | 24         |
| Enteritis                          | 1       | 3         | 0      | 0         | 0        | 0        | 0         | 0     | 4          |
| Hepatitis                          | 3       | 5         | 0      | 1         | 0        | 0        | 0         | 2     | 11         |
| Nephritis                          | 0       | 0         | 0      | 0         | 0        | 0        | 0         | 2     | 2          |

|                                  |    |    |   |   |   |   |   |   |           |
|----------------------------------|----|----|---|---|---|---|---|---|-----------|
| <b>Bacterial</b>                 |    |    |   |   |   |   |   |   | <b>36</b> |
| Pneumonia                        | 3  | 4  | 3 | 1 | 2 | 0 | 1 | 0 | 14        |
| Enteritis                        | 2  | 0  | 0 | 0 | 0 | 0 | 0 | 0 | 2         |
| Hepatitis                        | 2  | 0  | 0 | 0 | 0 | 0 | 0 | 0 | 2         |
| Nephritis                        | 2  | 4  | 0 | 1 | 0 | 0 | 0 | 0 | 7         |
| Myositis                         | 1  | 1  | 2 | 0 | 2 | 1 | 1 | 0 | 8         |
| Osteomyelitis                    | 1  | 0  | 1 | 0 | 0 | 0 | 0 | 0 | 2         |
| Dermatitis                       | 1  | 0  | 0 | 0 | 0 | 0 | 0 | 0 | 1         |
| <b>Protozoan-parasitic</b>       |    |    |   |   |   |   |   |   | <b>69</b> |
| Meningoencephalitis              | 2  | 0  | 0 | 1 | 0 | 0 | 0 | 0 | 3         |
| Pneumonia                        | 7  | 3  | 2 | 0 | 0 | 0 | 0 | 0 | 12        |
| Myocarditis                      | 0  | 0  | 0 | 3 | 0 | 0 | 0 | 0 | 3         |
| Vasculitis                       | 0  | 5  | 0 | 0 | 0 | 0 | 0 | 0 | 5         |
| Colitis                          | 15 | 5  | 0 | 0 | 0 | 0 | 0 | 0 | 20        |
| Enteritis                        | 2  | 2  | 0 | 1 | 0 | 0 | 0 | 0 | 5         |
| Hepatitis                        | 8  | 0  | 0 | 0 | 0 | 0 | 0 | 0 | 8         |
| Gastritis<br>(ventriculitis)     | 0  | 1  | 0 | 1 | 0 | 0 | 0 | 3 | 5         |
| Nephritis                        | 2  | 0  | 0 | 0 | 0 | 0 | 0 | 0 | 2         |
| Splenitis                        | 3  | 0  | 0 | 0 | 0 | 0 | 0 | 0 | 3         |
| Dermatitis                       | 0  | 1  | 0 | 1 | 1 | 0 | 0 | 0 | 3         |
| <b>Miscellaneous<sup>2</sup></b> | 9  | 17 | 7 | 0 | 2 | 2 | 0 | 2 | <b>39</b> |
| <b>Non-infectious</b>            |    |    |   |   |   |   |   |   | <b>67</b> |
| <b>Traumatic<sup>3</sup></b>     |    |    |   |   |   |   |   |   | <b>46</b> |
| Cranioencephalic<br>trauma       | 2  | 5  | 1 | 2 | 0 | 2 | 0 | 0 | 12        |
| Laceration of internal<br>organs | 5  | 4  | 1 | 0 | 0 | 0 | 0 | 0 | 10        |

|                                     |   |   |   |   |   |   |   |   |           |
|-------------------------------------|---|---|---|---|---|---|---|---|-----------|
| Electrothermal burns                | 3 | 0 | 4 | 0 | 1 | 0 | 0 | 0 | 7         |
| Multifocal perforating wounds       | 1 | 0 | 1 | 1 | 0 | 0 | 2 | 0 | 6         |
| Multiple exposed fracture           | 1 | 1 | 0 | 0 | 0 | 0 | 0 | 2 | 4         |
| Hip fracture                        | 2 | 1 | 0 | 0 | 0 | 1 | 0 | 0 | 4         |
| Central nervous system haemorrhages | 1 | 0 | 2 | 0 | 0 | 0 | 0 | 0 | 3         |
| <b>Degenerative disease</b>         |   |   |   |   |   |   |   |   | <b>4</b>  |
| Neoplasm                            | 0 | 1 | 0 | 0 | 0 | 0 | 0 | 0 | 1         |
| Myxomatous valve degeneration       | 0 | 1 | 0 | 0 | 0 | 0 | 0 | 1 | 2         |
| Crystal deposits                    | 0 | 0 | 0 | 0 | 0 | 0 | 0 | 1 | 1         |
| <b>Toxic</b>                        |   |   |   |   |   |   |   |   | <b>5</b>  |
| Hepatic necrosis                    | 0 | 1 | 0 | 0 | 0 | 0 | 0 | 2 | 3         |
| Haemorrhages generalized            | 0 | 0 | 0 | 0 | 0 | 0 | 0 | 2 | 2         |
| <b>Miscellaneous<sup>4</sup></b>    | 4 | 6 | 2 | 0 | 0 | 0 | 0 | 0 | <b>12</b> |

<sup>1</sup>infectious etiologies were inferred based on inflammatory infiltrate;

<sup>2</sup>miscellaneous infectious lesions are non-relevant focal lesions;

<sup>3</sup>main injury associated with the cause of traumatic death was recorded;

<sup>4</sup>miscellaneous non-infectious alterations are non-relevant focal lesions

203

204

205

206

207

**Fig 1. Frequent pathological findings associated with inflammatory processes in wild animals.** A) Brain (*Procyon lotor*-raccoon). Perivascular lymphoplasmacytic encephalitis associated with CDV infection (Arrowhead; H&E 200x). B) Trachea (*Pelecanus occidentalis*-brown pelican). Ulcerative haemorrhagic pyogranulomatous tracheitis with pseudomembrane formation (arrowhead: H&E 200x). C) Heart (*Didelphis marsupialis*-opossum). Lymphoplasmacytic myocarditis associated

208 with *Trypanosoma cruzi* amastigotes (Arrowhead; H&E 200x). D) Liver (*Pelecanus occidentalis*-brown pelican).  
 209 Lymphoplasmacytic and necrotizing hepatitis associated with flavivirus infection (arrowhead; H&E 200x) E) Kidney (*Canis*  
 210 *latrans*-coyote). Lymphoplasmacytic interstitial nephritis (arrowhead; H&E 200x). F) Kidney (*Jabiru mycteria*-jabiru).  
 211 Necrotizing granulomatous glomerulonephritis with crystal formation (arrowhead; H&E 100x).

## 212 Identification of viral, protozoan, bacterial and parasitic infectious agents by taxonomic group

213 Ten virus, seven protozoa, and seven bacteria were identified in mammalian specimens. In 22 cases, these  
 214 pathogens were involved with lesions or systemic disease, of which, 19 were directly associated with the cause  
 215 of death of mammals. Only *Sarcocystis* spp. detected in two cases was an incidental finding. Additionally, 38  
 216 mammals had internal parasites (23 different genera). Multi-parasitosis was observed in 13 (17.1%) of the cases.  
 217 Parasites such as *Prosthenorchis* spp. (n=15), *Angiostrongylus* spp. (n=6), and *Cilycospirura* spp. (n=1) were  
 218 responsible for severe parasitosis with systemic disease. Some of the lesions such as pyogranulomatous and  
 219 eosinophilic meningoencephalitis, pyogranulomatous abscessing bronchopneumonia and eosinophilic gastritis  
 220 associated with infectious agents are observed in Fig 2 (see legend). In 69% (n=43) of the mammalian cases,  
 221 infectious agents with zoonotic potential such as *Klebsiella pneumoniae*, *Toxoplasma gondii*, *Angiostrongylus*  
 222 spp. were identified. The etiological agents identified by taxonomic groups and the number of specimens  
 223 analyzed are specified in Table 3.

224 **Table 3: Number of infectious agents tested and positive in mammals according to etiology.**

|                  | Etiological agent                      | Mammalian taxonomic groups (positives) |           |        |           |          |          |           |
|------------------|----------------------------------------|----------------------------------------|-----------|--------|-----------|----------|----------|-----------|
|                  |                                        | Primate                                | Carnivora | Pilosa | Marsupial | Rodentia | Ungulate | Cingulate |
| <b>Viral</b>     | Canine Distemper Virus (n=18)          | 0                                      | 10        | 0      | 0         | 0        | 0        | 0         |
|                  | Alphaviruses (n=9)                     | 0                                      | 0         | 0      | 0         | 0        | 0        | 0         |
|                  | Flaviviruses (n=9)                     | 0                                      | 0         | 0      | 0         | 0        | 0        | 0         |
|                  | Influenza virus (n=8)                  | 0                                      | 0         | 0      | 0         | 0        | 0        | 0         |
|                  | Rabies virus (n=76)                    | 0                                      | 0         | 0      | 0         | 0        | 0        | 0         |
| <b>Bacterial</b> | <i>Clostridium perfringens</i> (n= 18) | 0                                      | 0         | 0      | 0         | 0        | 1        | 0         |

|                              |                                      |    |   |   |   |   |   |   |
|------------------------------|--------------------------------------|----|---|---|---|---|---|---|
|                              | <i>Escherichia coli</i> (n=18)       | 1  | 0 | 0 | 0 | 0 | 0 | 0 |
|                              | <i>Klebsiella pneumoniae</i> (n=18)  | 1  | 0 | 0 | 0 | 0 | 0 | 0 |
|                              | <i>Trueperella pyogenes</i> . (n=18) | 0  | 0 | 0 | 0 | 1 | 0 | 0 |
|                              | <i>Staphylococcus aureus</i> (n=18)  | 1  | 1 | 1 | 0 | 0 | 0 | 0 |
|                              | <i>Mycobacterium</i> spp. (n=18)     | 0  | 0 | 0 | 0 | 0 | 0 | 0 |
| <b>Protozoan</b>             | <i>Toxoplasma gondii</i> (n=4)       | 2  | 0 | 0 | 0 | 0 | 0 | 0 |
|                              | <i>Trypanosoma</i> spp. (n=14)       | 0  | 0 | 0 | 3 | 0 | 0 | 0 |
|                              | <i>Leishmania</i> spp. (n=8)         | 0  | 0 | 0 | 0 | 0 | 0 | 0 |
|                              | <i>Sarcocystis</i> spp. (n=5)        | 0  | 1 | 0 | 0 | 0 | 1 | 0 |
| <b>Parasitic<sup>1</sup></b> | <i>Angiostrongylus</i> spp.          | 0  | 5 | 0 | 1 | 0 | 0 | 0 |
|                              | <i>Dirofilaria</i> spp.              | 0  | 4 | 0 | 0 | 0 | 0 | 0 |
|                              | <i>Dipetalonema</i> spp.             | 5  | 0 | 2 | 0 | 0 | 0 | 0 |
|                              | <i>Gnathostoma</i> spp.              | 0  | 0 | 0 | 1 | 0 | 0 | 0 |
|                              | <i>Baylisascaris</i> spp.            | 0  | 1 | 0 | 0 | 0 | 0 | 0 |
|                              | <i>Ancylostoma</i> spp.              | 0  | 1 | 0 | 0 | 0 | 0 | 0 |
|                              | <i>Cylicospirura</i> spp.            | 0  | 1 | 0 | 0 | 0 | 0 | 0 |
|                              | <i>Prosthenorchis</i> spp.           | 10 | 5 | 0 | 0 | 0 | 0 | 0 |
|                              | <i>Macracanthorhynchus</i> spp.      | 0  | 1 | 0 | 0 | 0 | 0 | 0 |
|                              | <i>Spirometra</i> spp.               | 0  | 2 | 0 | 0 | 0 | 0 | 0 |

n= Number tested;

<sup>1</sup> Only zoonotic parasites are shown

225

226 **Fig 2. Infectious agents in lesions identified in wild animals.** A) Brain (*Alouatta palliata*-howler monkey). Presence of  
 227 protozoan pseudocysts in the blood vessel, morphology compatible with *Toxoplasma gondii* (arrowhead; H&E 600x). B)  
 228 Brain (*Didelphis marsupialis*-opossum). Pyogranulomatous and eosinophilic meningoencephalitis associated with  
 229 *Angiostrongylus* spp. (arrowhead; H&E 400x). Inset: Nematode magnification (H&E 200x & 400x). C) Lung (*Alouatta*  
 230 *palliata*-howler monkey). Pyogranulomatous abscessing bronchopneumonia associated with *Klebsiella pneumoniae*  
 231 (arrowhead; H&E 200x). Inset: Bacterial aggregates magnification (H&E 600x). D) Lung (*Cebus imitator*-white-faced



232 monkey). Pyogranulomatous and eosinophilic pleuro-bronchopneumonia associated to multiple *Filariopsis* spp.  
 233 nematodes (arrowhead; H&E 40x). Inset: Nematode magnification (H&E 200x). E) Ventricle (*Pelecanus occidentalis*- brown  
 234 pelican). Pyogranulomatous ulcerative and eosinophilic ventriculitis associated with multiple *Contracaecum* spp.  
 235 nematodes (arrowhead; H&E 40x). F) Jejunum (*Ateles geoffroyi*-spider monkey). Pyogranulomatous and necrotizing  
 236 jejunitis associated with *Staphylococcus aureus* infection (arrowhead; H&E x200). G) Stomach (*Herpailurus yagouaroundi*-  
 237 jaguarundi). Eosinophilic gastritis associated with multiple *Cylicospirura* spp. nematodes (arrowhead; H&E 40x). H) Skeletal  
 238 muscle (*Nasua narica-coati*). Presence of protozoan cyst, morphology consistent with *Sarcocystis* spp (arrowhead; H&E  
 239 200x). I) Skin (*Sphiggurus mexicanus*-porcupine) Pyogranulomatous and eosinophilic dermatitis associated with massive  
 240 infestation of *Sarcoptes* spp. (arrowhead; H&E 400x). Inset: Mites magnification (H&E 100x).

241 All birds submitted were evaluated for the presence of the (n=9) virus, two of the birds, which were involved in  
 242 an episode of high mortality during the study period, were positive for flaviviruses. Additionally, three birds had  
 243 internal parasites (2 different genera). Most of the pathogens identified were directly associated as the cause  
 244 of the death of birds and linked with lesions illustrated in Fig 2. Only *Procyrnea* spp. identified in one case was  
 245 an incidental finding. In 22.2% (n=2) of the birds cases, infectious agents with zoonotic potential such as  
 246 *Contracaecum* spp. were identified. The etiological agents identified in birds and the number of samples  
 247 analyzed are specified in Table 4.

248 **Table 4: Number of infectious agents tested and positive in birds according to etiology.**

|                           | Etiological agent                    | Birds    |
|---------------------------|--------------------------------------|----------|
|                           |                                      | Positive |
| <b>Viral diseases</b>     | Alphaviruses (n=3)                   | 0        |
|                           | Flaviviruses (n=3)                   | 2        |
|                           | Influenza virus (n=9)                | 0        |
|                           | Newcastle virus (n=9)                | 0        |
| <b>Bacterial diseases</b> | <i>Clostridium perfringens</i> (n=1) | 0        |
|                           | <i>Escherichia coli</i> (n=1)        | 0        |

|                           |                                    |   |
|---------------------------|------------------------------------|---|
|                           | <i>Klebsiella pneumoniae</i> (n=1) | 0 |
|                           | <i>Salmonella</i> spp. (n=1)       | 0 |
|                           | <i>Staphylococcus aureus</i> (n=1) | 0 |
| <b>Parasites diseases</b> | <i>Contraecaecum</i> spp.          | 2 |

n= number of tested;

<sup>1</sup> only zoonotic parasites are shown

249

## 250 Geospatial distribution of detected infectious agents and their accumulation by geographic 251 region

252 We established a distribution of the most frequently identified infectious agents in the analyzed specimens (Fig  
253 3). First, a wide distribution of zoonotic parasites was evidenced in the country. Then, there was an  
254 accumulation in the Central Pacific region of specimens with acanthocephaliasis (12 with *Prosthenorchis* spp.,  
255 one with *Macracanthorhynchus* spp.), and an accumulation of specimens with gastrointestinal nematodes in  
256 the great metropolitan area and tourist areas of Guanacaste (six with *Angiostrongylus* spp., one with  
257 *Baylisascaris* spp., one with *Ancylostoma* spp.). Additionally, vector-borne diseases occurred exclusively in  
258 specimens from coastal regions and altitudes less than 300 meters above sea level (11 with filariae, two with  
259 flaviviruses). The CDV present in carnivores from various areas of the country did not show a specific pattern of  
260 distribution (n=10). It is important to note that the Caribbean-south and southern part of the country do not  
261 present any pattern because there was no shipment of samples from this area, a caveat of this scheme of passive  
262 surveillance. The analyzed specimens associated with these infectious agents can be observed in S1 Fig.

263

### 264 **Fig 3. Geographical distribution of the most frequently identified infectious agents in the referred specimens.**

265 The individuals reported as negative were depicted even though the infectious agent was not detected in the  
266 complementary analyzes or no lesions suggestive of the disease were found in the pathological analysis.

## 267 Discussion

268 The schemes aimed to develop epidemiological surveillance of infectious agents in free-living vertebrates have  
269 proven to be a fundamental tool in monitoring pathogens of zoonotic importance [65–67]. These surveillance  
270 systems are even more critical in geographical areas where high rates of biodiversity are prominent [7]. For  
271 example, Costa Rica is economically dependent on its ecotourism services, and its fauna is one of its most  
272 important assets [68]. However, currently, there is no epidemiological surveillance system directed to wildlife  
273 and to study outbreaks or any other health event involving them.

274 Evaluating the viability of implementing a passive surveillance system should be essential for a country  
275 considered a "hotspot" for the appearance or emergence of new infectious agents associated with its  
276 biodiversity and fauna characteristics [14,18]. However, some authors have established obstacles to  
277 implementing this type of system. These obstacles are mainly related to bureaucratic restrictions, financial  
278 disincentives, lack of legislation for data collection, and willingness to cooperate between agencies [69,70]. We  
279 encounter during this research those same obstacles for implementing surveillance systems in wildlife animals  
280 in Costa Rica.

281 Centers specialized in wildlife disease surveillance and health have shown that it is possible to establish robust  
282 and sustainable disease surveillance systems with broad coverage and diagnostic capacity [25,65,66,71].  
283 However, factors such as logistics, rescue centers location, and dependence on voluntary staff excluded the  
284 participation of some geographic regions of the country (remote or difficult-to-access areas), affecting the  
285 efficiency and sustainability of surveillance system implemented in our research. These findings are consistent  
286 with other studies, where significant constraints hindered the availability of carcasses for analysis [72,73].

287 Reporting and dispatching of carcasses by national wildlife and animal health authorities were lower than rescue  
288 centers. These patterns agree with previous reports indicating that notification of wildlife mortality or morbidity  
289 generally depends on the initial detection of cases by the general public [22,74–76]. As a result, cases are biased

290 towards events in populated or easily accessible areas with nearby wildlife management centers, this added to  
291 the logistic capacity (storage, packaging, and shipping) of some of these centers, would explain the higher  
292 dispatch of cases. An example of these biases is the accumulation of reported cases in the Central Pacific region.  
293 Wildlife management centers often report data with similar mortalities between birds and mammals [67,76].  
294 However, in our study, there is a higher number of mammalians received. This difference is probably related to  
295 the fact that the surveillance systems in those countries actively include avian influenza surveillance, leading to  
296 a higher reporting of birds than our study. In our case, there is no surveillance system for avian influenza in wild  
297 birds by the local veterinary authority, and the suspected cases of this virus are confined to the local poultry  
298 production systems [71]. On the other hand, most of the birds found were no longer suitable for the study, thus  
299 underestimating the number of birds that die for various reasons [77].

300 Regarding the mammals, two taxa presented a higher representation (carnivores and primates). These data can  
301 be associated with the fact that they are medium to large-sized animals and with a more significant contact of  
302 these species with human environments, facilitating the recognition of morbidities and mortalities [23]. Human  
303 proximity with these mammals enabled the detection of infectious diseases, which is highly represented in these  
304 groups [78,79].

305 The distribution of the causes of death established in our research is consistent with most studies, highlighting  
306 traumatic events (anthropogenic effect) as the leading cause of death in these wild species [73,80–82]. Most of  
307 the traumas correspond to vehicular collisions, with a high percentage reported in urban areas or roads that  
308 cross or pass near forest areas. However, the number of deceased animals may be underestimated since not all  
309 cases are reported or recorded, much less referred to the laboratory since the condition of the corpses is not  
310 suitable for the study [83,84].

311 In addition, most of the traumatic cases presented some pre-existing infectious pathology. Free-living animals  
312 are frequently exposed to infectious agents naturally, so it is common in post-mortem analysis to find incidental  
313 lesions associated [82,85,86]. In wild animals highly exposed to human conditions, factors such as climate  
314 change and anthropogenic impact could become stressful stimuli, which facilitate these infectious agents to  
315 evolve into severe disease and increase the risk of suffering a traumatic event [82,87]. However, it is difficult to  
316 establish a clear association [88,89].

317 Some of these identified infectious agents cause foodborne illness in human populations. Examples of these are  
318 *Clostridium* spp., *Toxoplasma* sp. and *Sarcocystis* spp. Although the law prohibits hunting in Costa Rica, there is  
319 the illegal consumption of wild animal meat. Consequently, this type of practice might favor the transmission of  
320 infectious agents and lead to local outbreaks or maintain circulating virulent strains in local human populations  
321 [90–93].

322 Our study shows the presence of potentially zoonotic bacterial infectious agents classified as emerging diseases  
323 in some regions [94–96]. The most relevant are *Klebsiella pneumoniae*, *Escherichia coli*, and *Staphylococcus*  
324 *aureus*, which were associated with primary disease in some of the analyzed specimens. The direct or indirect  
325 contact occurs through the handling of these wild animals, thus facilitating the transmission, which evidences a  
326 latent risk. In addition, these bacteria currently top the list of infectious agents with antibiotic resistance genes,  
327 making them considered within antimicrobial surveillance schemes [97,98]. Furthermore, cases of antimicrobial  
328 resistance have already been demonstrated in Costa Rica with other bacteria in wild animals in urban  
329 environments, thus reflecting the need for a wildlife pathogen surveillance scheme to consider active  
330 antimicrobial resistance monitoring [31,99].

331 Zoonotic vector-borne diseases arise when there is a conjunction of spatial-temporal factors and other variables  
332 (reservoirs, climate, susceptible population, among others) [100]. Environmental conditions in tropical regions  
333 favor these diseases that significantly impact public health and are recognized as agents with epidemic potential

334 in Latin America [101–103]. We identified many primates and carnivores with infectious agents of vector  
335 transmission, for example, *Dirofilaria* spp. and *Dipetalonema* spp. mainly present in low-lying areas (CoastLine).  
336 These regions are already defined as endemic areas for these parasites in domestic animals [104,105].  
337 Nevertheless, detecting this type of agent in a jungle cycle reveals a potential risk to public health in places with  
338 a high rate of visiting tourists in Costa Rica. This risk is reinforced by reports of the health system, which showed  
339 at least three disease cases in humans associated with *Dirofilaria immitis* and isolated cases of subcutaneous  
340 filariasis [106–108].

341 Similarly, several Latin American countries are considered endemic to various diseases caused by arboviruses  
342 [109]. In Costa Rica, other studies have identified the stationary circulation of this type of agent in humans and  
343 animals in various regions [33,110,111]. The cases of arbovirus-flaviviruses detected in our research are  
344 consistent with the high circulation of this type of virus in Costa Rica [33,111]. Furthermore, this agent was  
345 associated with a mass mortality of pelicans during the conduct of our research. Detecting virus-related  
346 mortalities such as West Nile in wild birds (as it was possibly our case) allows early alerts. It has been shown  
347 that there is a higher risk of exposure for human populations close to the regions where mortalities of wild birds  
348 occur [112,113].

349 The canine Distemper virus (CDV) (genus: morbillivirus) is a pernicious infectious agent with a global distribution  
350 that affects at least 20 families of mammals. Especially susceptible are carnivores of all species [114,115].  
351 Endemic CDV outbreaks have been reported anecdotally throughout Costa Rica and America in dog populations  
352 and, more recently, sporadic outbreaks in wild carnivores of urban and suburban areas in the country have been  
353 recorded [116,117]. CDV was identified in our studies, reflecting the relevance of this virus in the role of spillover  
354 towards carnivore species and possibly the implications of a spillback towards susceptible or non-vaccinated  
355 domestic canines [117–119]. Costa Rica has a domestic dog population of ~250 thousand animals, mainly

356 located in urban areas. Herd immunity data in this population is uncertain, especially for dogs without an owner  
357 or in non-urban areas, where owners neglect these vaccines. Indeed, this poses a risk to wild carnivores,  
358 especially in urban areas with susceptible canine populations. Furthermore, the possibility of transmission of  
359 this virus to other species beyond carnivores is a hypothesis that has been investigated [120]. Given the high  
360 diversity of vertebrates present in Costa Rica, this virus should be considered within epidemiological surveillance  
361 programs.

362 This study did not detect rabies virus infections. This findings are supported by previous studies in wild animals  
363 in Costa Rica [32]. However, human and productive animal fatalities have been reported associated with rabies  
364 infections, which stresses the relevance of its continuous monitoring [38,121]. A similar situation applies to  
365 Newcastle and Influenza virus. In our samples, none of the birds showed evidence of disease or associated  
366 clinical signs. However, due to the sanitary status (declared itself free) of Costa Rica for these avian viral agents  
367 and the risk for national poultry production, it is advisable to establish monitoring in any event of mortality of  
368 wild birds in the country [122,123].

369 The gastrointestinal and pulmonary parasites detected in this study are relevant for public health and wildlife  
370 conservation programs. For instance, the nematodes *Baylisascaris* spp., *Ancylostoma* spp., and *Cylicospirura*  
371 spp. were detected in mammalian species located in densely populated areas. Furthermore, we identified  
372 parasites transmitted by water or food of aquatic origin (such as the cestode *Spirometra* spp. and the nematodes  
373 *Contracaecum* spp. and *Gnathostoma* spp.) mainly in rural areas of the country's northern region. In this region,  
374 fishing and rivers for recreational, irrigation, and consumption purposes are common, showing possible  
375 contamination in both ways [124,125].

376 The last two reports of human angiostrongyliasis in Costa Rica have shown 12.9% seropositivity in the screening  
377 test, the majority were children under the age of ten who reside in San José, which is the province with the  
378 highest number of human samples [126,127]. In this study, six specimens of mammals infected by

379 *Angiostrongylus* spp. were identified, mainly in the *Nasua narica* species, from recreational parks in cities in the  
380 country's northern region. This species has been established as the definitive host in the parasite's life cycle  
381 [128]. The high degree of positive cases suggests a high prevalence of the parasite in the mammalian reservoir.  
382 This result evidences the urgency of expanding sampling with better diagnostic techniques in children and wild  
383 carnivores from these regions. The same situation happens with the number of cases detected with  
384 acanthocephalans (*Prosthenorchis* spp., *Macracanthorhynchus* spp.) in the Central Pacific region. There is no  
385 information on the real prevalence in animal populations, nor are there samplings that allow detecting cases in  
386 humans in this region, despite the zoonotic risk previously mentioned [129,130].

387 Finally, we could not identify the causative agent of lesions in some of the samples analyzed. However,  
388 histological changes suggest the presence of an infectious agent. Although we analyzed samples for the main  
389 circulating infectious agents in Costa Rica, no conclusive data was obtained for some of them. Ranges of 17-22%  
390 have been reported in pathological studies in wild species, where the causative agent of the disease cannot be  
391 determined, mainly associated with the degree of autolysis and the diagnostic complexity [25,73,82,85]. These  
392 results are consistent with the percentages of an absence of identification of the etiological agent in our  
393 samples. These results show that further work is necessary to develop robust diagnostic techniques for wild  
394 animals and efforts and incentives financed by government authorities in the surveillance of pathogens in  
395 wildlife through the consistent implementation of new generation metagenomics [131–134].

396 Most of the pathogens detected in our study have already been previously identified in wild animals in Costa  
397 Rica, and the detection of an infectious agent in a wild specimen does not necessarily imply disease or affect  
398 wild populations [30,33,41,128]. However, monitoring the general health status of wild animals over time allows  
399 us to know the circulation and behavior of these pathogens, as well as to provide an early warning of epidemic  
400 events. This information can be used by health authorities together with a preventive strategy and a ONE



401 HEALTH approach to address zoonotic diseases, facilitating more specific public health interventions,  
402 implementing measures to reduce the risk of spread [25,66,73] .

403 This study was performed as a pilot and was the first structured attempt to test the establishment of a passive  
404 epidemiological surveillance scheme for diseases in wild vertebrates. However, it highlights the necessity of an  
405 inter-institutional and trans-institutional commitment with the sustainability over time of this surveillance  
406 scheme focused on the benefits beyond the economic part. For example, this work allowed us to estimate the  
407 general health status of the country's wildlife and know the distribution of pathogens in the national territory.  
408 This information is critical in regions established as hotspots for the emergence of infectious diseases due to  
409 their great biodiversity and social conditions [18].

## 410 **Acknowledgments**

411 The authors express deep appreciation to the National Animal Health Service (SENASA) and National Wildlife  
412 Service (SINAC) for their support and cooperation provided in this study and the wildlife management centers  
413 for the notification of specimens, especially DVM. Isabel Hagnauer Barrantes from Zooave rescue center, DVM.  
414 Martha Cordero Salas from Las Pumas rescue center and DVM. Carmen Soto Valverde from the Kids Saving the  
415 Rainforest rescue center, for their particular interest and participation. Also, the collaboration provided by the  
416 technicians of the laboratories of the Escuela de Medicina Veterinaria of the Universidad Nacional is  
417 appreciated.

## 418 **Author Contributions**

419 **Conceptualization: A.A.**

420 **Data curation: A.A., F.A., T.S., M.B.**

- 421 **Formal analysis: A.A., F.A., T.S., M.B.**
- 422 **Funding Acquisition: A.A.**
- 423 **Investigation: A.A., F.A., T.S.**
- 424 **Project administration: A.A.**
- 425 **Resources: A.A., T.S., E.B., A.J., C.J., M.P., G.D., M.S.**
- 426 **Supervision: A.A.**
- 427 **Software: A.A., F.A., T.S., M.B.**
- 428 **Visualization: A.A., F.A., T.S.**
- 429 **Writing – original draft: A.A., F.A., T.S., M.B., E.B.**
- 430 **Writing – review & editing: A.A.A., F.A., T.S., M.B., E.B., A.J., C.J., M.P., G.D., B.L., E.C.A., M.S.**
- 431 **All authors have read and agreed to the published version of the manuscript.**
- 432 **Conflicts of Interest: the authors declare no conflict of interest.**

## References

1. Morens DM, Folkers GK, Fauci AS. The challenge of emerging and re-emerging infectious diseases. *Nature*. 2004; 430:242–9. doi: 10.1038/nature02759 PMID: 15241422.
2. Bloom DE, Cadarette D. Infectious Disease Threats in the Twenty-First Century: Strengthening the Global Response. *Front Immunol*. 2019; 10:549. doi: 10.3389/fimmu.2019.00549 PMID: 30984169.
3. CEPAL. América Latina y el Caribe ante la pandemia del COVID-19 Efectos económicos y sociales. Chile: ONU 2020. Available from: <https://repositorio.cepal.org/handle/11362/45337>.
4. PNUD. Evaluación económica inicial de los efectos de covid-19 y el alcance de las opciones de política en Costa Rica. Síntesis para la discusión y análisis de políticas. Costa Rica: 19 programa de las naciones unidas para el desarrollo 2020. Available from: <https://www.cr.undp.org/content/costarica/es/home/library/evaluacion-economica-inicial-de-los-efectos-de-covid-19-y-alcanc.html>.
5. Shepard DS, Coudeville L, Halasa YA, Zambrano B, Dayan GH. Economic impact of dengue illness in the Americas. *Am J Trop Med Hyg*. 2011; 84:200–7. doi: 10.4269/ajtmh.2011.10-0503 PMID: 21292885.
6. Zohrabian A, Meltzer MI, Ratard R, Billah K, Molinari NA, Roy K, et al. West Nile virus economic impact, Louisiana, 2002. *Emerging Infect Dis*. 2004; 10:1736–44. doi: 10.3201/eid1010.030925 PMID: 15504258.
7. Petrovan SO, Aldridge DC, Bartlett H, Bladon AJ, Booth H, Broad S, et al. Post COVID-19: a solution scan of options for preventing future zoonotic epidemics. *Biol Rev Camb Philos Soc*. 2021. Epub 2021/07/07. doi: 10.1111/brv.12774 PMID: 34231315.
8. Viana M, Mancy R, Biek R, Cleaveland S, Cross PC, Lloyd-Smith JO, et al. Assembling evidence for identifying reservoirs of infection. *Trends Ecol Evol (Amst)*. 2014; 29:270–9. doi: 10.1016/j.tree.2014.03.002 PMID: 24726345.
9. Hassell JM, Begon M, Ward MJ, Fèvre EM. Urbanization and Disease Emergence: Dynamics at the Wildlife-Livestock-Human Interface. *Trends Ecol Evol (Amst)*. 2017; 32:55–67. doi: 10.1016/j.tree.2016.09.012 PMID: 28029378.

- 456 **10.** Haydon DT, Cleaveland S, Taylor LH, Laurenson MK. Identifying reservoirs of infection: a conceptual and practical  
457 challenge. *Emerging Infect Dis.* 2002; 8:1468–73. doi: 10.3201/eid0812.010317 PMID: 12498665.
- 458 **11.** Reif JS. Animal sentinels for environmental and public health. *Public Health Rep.* 2011; 126 Suppl 1:50–7.  
459 doi: 10.1177/00333549111260S108 PMID: 21563712.
- 460 **12.** Kowalewski MM, Salzer JS, Deutsch JC, Raño M, Kuhlenschmidt MS, Gillespie TR. Black and gold howler monkeys  
461 (*Alouatta caraya*) as sentinels of ecosystem health: patterns of zoonotic protozoa infection relative to degree of  
462 human-primate contact. *Am J Primatol.* 2011; 73:75–83. doi: 10.1002/ajp.20803 PMID: 20084672.
- 463 **13.** Jones KE, Patel NG, Levy MA, Storeygard A, Balk D, Gittleman JL, et al. Global trends in emerging infectious  
464 diseases. *Nature.* 2008; 451:990–3. doi: 10.1038/nature06536 PMID: 18288193.
- 465 **14.** Walsh MG, Sawleshwarkar S, Hossain S, Mor SM. Whence the next pandemic? The intersecting global geography of  
466 the animal-human interface, poor health systems and air transit centrality reveals conduits for high-impact  
467 spillover. *One Health.* 2020; 11:100177. Epub 2020/10/08. doi: 10.1016/j.onehlt.2020.100177 PMID: 33052311.
- 468 **15.** Engering A, Hogerwerf L, Slingenbergh J. Pathogen-host-environment interplay and disease emergence. *Emerg*  
469 *Microbes Infect.* 2013; 2:e5. Epub 2013/06/02. doi: 10.1038/emi.2013.5 PMID: 26038452.
- 470 **16.** Altizer S, Bartel R, Han BA. Animal migration and infectious disease risk. *Science.* 2011; 331:296–302.  
471 doi: 10.1126/science.1194694 PMID: 21252339.
- 472 **17.** White RJ, Razgour O. Emerging zoonotic diseases originating in mammals: a systematic review of effects of  
473 anthropogenic land-use change. *Mamm Rev.* 2020. Epub 2020/06/02. doi: 10.1111/mam.12201 PMID: 32836691.
- 474 **18.** Allen T, Murray KA, Zambrana-Torrel C, Morse SS, Rondinini C, Di Marco M, et al. Global hotspots and correlates  
475 of emerging zoonotic diseases. *Nat Commun.* 2017; 8:1124. Epub 2017/10/24. doi: 10.1038/s41467-017-00923-8  
476 PMID: 29066781.
- 477 **19.** World Health Organization. Anticipating Emerging Infectious Disease Epidemics. Switzerland: WHO 2015. Available  
478 from: <https://apps.who.int/iris/bitstream/handle/10665/252646/WHO-OHE-PED-2016.2-eng.pdf>.
- 479 **20.** World Organisation for Animal Health. Training manual on surveillance and international reporting of diseases in  
480 wild animals second cycle. Workshop for OIE National Focal Points for Wildlife. Paris: OIE 2015. Available from:

- 481 [https://www.oie.int/fileadmin/Home/eng/International\\_Standard\\_Setting/docs/pdf/WGWildlife/A\\_Training\\_Manual\\_Wildlife\\_2.pdf](https://www.oie.int/fileadmin/Home/eng/International_Standard_Setting/docs/pdf/WGWildlife/A_Training_Manual_Wildlife_2.pdf).
- 482
- 483 **21.** International Bank for Reconstruction and Development. People, pathogens and our planet. The Economics of One  
484 Health. Washington DC: The World Bank 2012. Available from:  
485 [https://openknowledge.worldbank.org/bitstream/handle/10986/11892/691450ESW0whit0D0ESW120PPPvol120w  
486 eb.pdf?sequence=1&isAllowed=y](https://openknowledge.worldbank.org/bitstream/handle/10986/11892/691450ESW0whit0D0ESW120PPPvol120web.pdf?sequence=1&isAllowed=y).
- 487 **22.** Sleeman JM. Strategies for Wildlife Disease Surveillance. United States: U.S. Geological Survey National Wildlife  
488 Health Center 2012. Available from:  
489 <https://digitalcommons.unl.edu/cgi/viewcontent.cgi?article=1981&context=usgsstaffpub>.
- 490 **23.** Guberti V. Surveillance, monitoring and surveys of wildlife diseases: a public health and conservation approach.  
491 Italy: Hystrix, the Italian Journal of Mammalogy 2014. Available from: [http://www.italian-journal-of-  
492 mammalogy.it/Surveillance-monitoring-and-surveys-of-wildlife-diseases-a-public-health-and-  
493 conservation,77207,0,2.html](http://www.italian-journal-of-mammalogy.it/Surveillance-monitoring-and-surveys-of-wildlife-diseases-a-public-health-and-conservation,77207,0,2.html).
- 494 **24.** Lamarque F. Le reseau SAGIR, reseau national de suivi sanitaire de la faune sauvage française. Paris: Epidémiol. et  
495 santé anim 2000. Available from:  
496 [https://www.researchgate.net/profile/Marc\\_Artois/publication/237744255\\_Le\\_reseau\\_SAGIR\\_reseau\\_national\\_d  
497 e\\_suivi\\_sanitaire\\_de\\_la\\_faune\\_sauvage\\_francaise/links/00b7d529709d2110a0000000/Le-reseau-SAGIR-reseau-  
498 national-de-suivi-sanitaire-de-la-faune-sauvage-francaise.pdf](https://www.researchgate.net/profile/Marc_Artois/publication/237744255_Le_reseau_SAGIR_reseau_national_de_suivi_sanitaire_de_la_faune_sauvage_francaise/links/00b7d529709d2110a0000000/Le-reseau-SAGIR-reseau-national-de-suivi-sanitaire-de-la-faune-sauvage-francaise.pdf).
- 499 **25.** Leighton FA, Wobeser GA, Barker IK, Daoust PY, Martineau D. The Canadian Cooperative Wildlife Health Centre  
500 and surveillance of wild animal diseases in Canada. Can Vet J. 1997; 38:279–84. Available from:  
501 <https://www.ncbi.nlm.nih.gov/pmc/articles/PMC1576906/pdf/canvetj00090-0025.pdf>.
- 502 **26.** OPS. Veterinary public health: progress report on the secretariat’s compliance with the mandates of the paho  
503 governing bodies. México: Organización Panamericana de la Salud 2005. Available from:  
504 <https://iris.paho.org/bitstream/handle/10665.2/40542/rimsa14-03-e.pdf?sequence=1&isAllowed=y>.

- 505 **27.** Rojas H, Romero JR. Where to next with animal health in Latin America? The transition from endemic to disease-  
506 free status. *Rev - Off Int Epizoot.* 2017; 36:331–48. doi: 10.20506/rst.36.1.2633 PMID: 28926004.
- 507 **28.** USDA. Report on the Review of Costa Rica’s Animal Health Statuses. Estados Unidos: United States Department of  
508 Agriculture 2019. Available from: [https://www.aphis.usda.gov/import\\_export/downloads/costarica-status-](https://www.aphis.usda.gov/import_export/downloads/costarica-status-review.pdf)  
509 [review.pdf](https://www.aphis.usda.gov/import_export/downloads/costarica-status-review.pdf).
- 510 **29.** World Organisation for Animal Health. Informe de Misión Piloto Evaluación PVS “Una Salud”. Paris: OIE 2011.  
511 Available from: [https://www.oie.int/fileadmin/Home/eng/Support\\_to\\_OIE\\_Members/pdf/InterimReport-](https://www.oie.int/fileadmin/Home/eng/Support_to_OIE_Members/pdf/InterimReport-Costa_Rica.pdf)  
512 [Costa\\_Rica.pdf](https://www.oie.int/fileadmin/Home/eng/Support_to_OIE_Members/pdf/InterimReport-Costa_Rica.pdf).
- 513 **30.** Baldi M, Alvarado G, Smith S, Santoro M, Bolaños N, Jiménez C, et al. Baylisascaris procyonis Parasites in Raccoons,  
514 Costa Rica, 2014. *Emerging Infect Dis.* 2016; 22:1502–3. doi: 10.3201/eid2208.151627 PMID: 27433741.
- 515 **31.** Baldi M, Barquero Calvo E, Hutter SE, Walzer C. Salmonellosis detection and evidence of antibiotic resistance in an  
516 urban raccoon population in a highly populated area, Costa Rica. *Zoonoses Public Health.* 2019; 66:852–60. Epub  
517 2019/07/29. doi: 10.1111/zph.12635 PMID: 31359623.
- 518 **32.** Baldi M, Hernández-Mora G, Jimenez C, Hutter SE, Alfaro A, Walzer C. Leptospira Seroprevalence Detection and  
519 Rabies Virus Absence in an Urban Raccoon (Procyon lotor) Population in a Highly Populated Area, Costa Rica.  
520 *Vector Borne Zoonotic Dis.* 2019; 19:889–95. Epub 2019/08/13. doi: 10.1089/vbz.2019.2444 PMID: 31407956.
- 521 **33.** Chaves A, Piche-Ovares M, Ibarra-Cerdeña CN, Corrales-Aguilar E, Suzán G, Moreira-Soto A, et al. Serosurvey of  
522 Nonhuman Primates in Costa Rica at the Human-Wildlife Interface Reveals High Exposure to Flaviviruses. *Insects.*  
523 2021; 12. Epub 2021/06/15. doi: 10.3390/insects12060554 PMID: 34203687.
- 524 **34.** Dolz G, Chaves A, Gutiérrez-Espeleta GA, Ortiz-Malavasi E, Bernal-Valle S, Herrero MV. Detection of antibodies  
525 against flavivirus over time in wild non-human primates from the lowlands of Costa Rica. *PLoS One.* 2019;  
526 14:e0219271. doi: 10.1371/journal.pone.0219271 PMID: 31276532.
- 527 **35.** Dubey JP, Morales JA, Sundar N, Velmurugan GV, González-Barrientos CR, Hernández-Mora G, et al. Isolation and  
528 genetic characterization of *Toxoplasma gondii* from striped dolphin (*Stenella coeruleoalba*) from Costa Rica. *J*  
529 *Parasitol.* 2007; 93:710–1. doi: 10.1645/GE-1120R.1 PMID: 17626370.

- 530 **36.** Fuentes-Ramírez A, Jiménez-Soto M, Castro R, Romero-Zuñiga JJ, Dolz G. Molecular Detection of Plasmodium  
531 malariae/Plasmodium brasilianum in Non-Human Primates in Captivity in Costa Rica. PLoS One. 2017;  
532 12:e0170704. doi: 10.1371/journal.pone.0170704 PMID: 28125696.
- 533 **37.** González K, Calzada JE, Saldaña A, Rigg CA, Alvarado G, Rodríguez-Herrera B, et al. Survey of wild mammal hosts of  
534 cutaneous leishmaniasis parasites in panamá and costa rica. Trop Med Health. 2015; 43:75–8. Epub 2014/12/06.  
535 doi: 10.2149/tmh.2014-30 PMID: 25859156.
- 536 **38.** Hutter SE, Brugger K, Sancho Vargas VH, González R, Aguilar O, León B, et al. Rabies in Costa Rica: Documentation  
537 of the Surveillance Program and the Endemic Situation from 1985 to 2014. Vector Borne Zoonotic Dis. 2016;  
538 16:334–41. Epub 2016/03/16. doi: 10.1089/vbz.2015.1906 PMID: 26982168.
- 539 **39.** Patiño W LC, Monge O, Suzán G, Gutiérrez-Espeleta G, Chaves A. Molecular Detection of Mycobacterium avium  
540 avium and Mycobacterium genavense in Feces of Free-living Scarlet Macaws ( *Ara macao*) in Costa Rica. J Wildl Dis.  
541 2018; 54:357–61. doi: 10.7589/2017-05-124 PMID: 29286261.
- 542 **40.** Pérez-Gómez G, Jiménez-Rocha AE, Bermúdez-Rojas T. Parásitos gastrointestinales de aves silvestres en un  
543 ecosistema ribereño urbano tropical en Heredia, Costa Rica. RBT. 2018; 66:788. doi: 10.15517/rbt.v66i2.33409.
- 544 **41.** Rojas-Jiménez J, Morales-Acuña JA, Argüello-Sáenz M, Acevedo-González SE, Yabsley MJ, Urbina-Villalobos A.  
545 Histopathological findings of infections caused by canine distemper virus, Trypanosoma cruzi, and other parasites  
546 in two free-ranging White-nosed Coatis *Nasua narica* (Carnivora: Procyonidae) from Costa Rica. J Threat Taxa.  
547 2021; 13:17521–8. doi: 10.11609/jott.5907.13.1.17521-17528.
- 548 **42.** World Organisation for Animal Health. Training manual on wildlife diseases and surveillance. Workshop for OIE  
549 National Focal Points for Wildlife. Paris: OIE 2010. Available from:  
550 [https://www.oie.int/fileadmin/Home/eng/International\\_Standard\\_Setting/docs/pdf/WGWildlife/A\\_Training\\_Manual\\_Wildlife.pdf](https://www.oie.int/fileadmin/Home/eng/International_Standard_Setting/docs/pdf/WGWildlife/A_Training_Manual_Wildlife.pdf).  
551
- 552 **43.** McAloose D, Colegrove KM, Newton AL. Wildlife Necropsy. Pathology of Wildlife and Zoo Animals. Elsevier; 2018.  
553 pp. 1–20.

- 554 **44.** Woodford MH, Bengis RG, Keet DF. Post-mortem procedures for wildlife veterinarians and field biologists. Paris:  
555 OIE; 2000.
- 556 **45.** Körbler T, Gršković M, Dominis M, Antica M. A simple method for RNA isolation from formalin-fixed and paraffin-  
557 embedded lymphatic tissues. *Experimental and Molecular Pathology*. 2003; 74:336–40. doi: 10.1016/s0014-  
558 4800(03)00024-8.
- 559 **46.** Da Budaszewski RF, Pinto LD, Weber MN, Caldart ET, Alves CDBT, Martella V, et al. Genotyping of canine distemper  
560 virus strains circulating in Brazil from 2008 to 2012. *Virus Res*. 2014; 180:76–83. Epub 2013/12/24.  
561 doi: 10.1016/j.virusres.2013.12.024 PMID: 24370870.
- 562 **47.** Grywna K, Kupfer B, Panning M, Drexler JF, Emmerich P, Drosten C, et al. Detection of all species of the genus  
563 Alphavirus by reverse transcription-PCR with diagnostic sensitivity. *J Clin Microbiol*. 2010; 48:3386–7.  
564 doi: 10.1128/JCM.00317-10 PMID: 20504990.
- 565 **48.** Scaramozzino N, Crance JM, Jouan A, DeBriel DA, Stoll F, Garin D. Comparison of flavivirus universal primer pairs  
566 and development of a rapid, highly sensitive heminested reverse transcription-PCR assay for detection of  
567 flaviviruses targeted to a conserved region of the NS5 gene sequences. *J Clin Microbiol*. 2001; 39:1922–7.  
568 doi: 10.1128/JCM.39.5.1922–1927.2001 PMID: 11326014.
- 569 **49.** Spackman E, Senne DA, Myers TJ, Bulaga LL, Garber LP, Perdue ML, et al. Development of a real-time reverse  
570 transcriptase PCR assay for type A influenza virus and the avian H5 and H7 hemagglutinin subtypes. *J Clin*  
571 *Microbiol*. 2002; 40:3256–60. doi: 10.1128/JCM.40.9.3256-3260.2002 PMID: 12202562.
- 572 **50.** Oliveira RdN, Souza SP de, Lobo RSV, Castilho JG, Macedo CI, Carnieli P, et al. Rabies virus in insectivorous bats:  
573 implications of the diversity of the nucleoprotein and glycoprotein genes for molecular epidemiology. *Virology*.  
574 2010; 405:352–60. doi: 10.1016/j.virol.2010.05.030 PMID: 20609456.
- 575 **51.** Carnieli P, Fahl WdO, Castilho JG, Oliveira RdN, Macedo CI, Durymanova E, et al. Characterization of Rabies virus  
576 isolated from canids and identification of the main wild canid host in Northeastern Brazil. *Virus Res*. 2008; 131:33–  
577 46. Epub 2007/09/21. doi: 10.1016/j.virusres.2007.08.007 PMID: 17889396.



- 578 **52.** Stauber. N. Detection of Newcastle disease virus in poultry vaccines using the polymerase chain reaction and direct  
579 sequencing of amplified cDNA. *Vaccine*. 1995; 13:360–4. doi: 10.1016/0264-410X(95)98257-B.
- 580 **53.** Homan W, Vercammen M, Braekeleer J de, Verschueren H. Identification of a 200- to 300-fold repetitive 529 bp  
581 DNA fragment in *Toxoplasma gondii*, and its use for diagnostic and quantitative PCR. Note: Nucleotide sequence  
582 data reported in this paper have been submitted to GenBank™ database with the accession number AF146527  
583 (*Toxoplasma gondii* genomic repetitive 529 bp fragment). *International Journal for Parasitology*. 2000; 30:69–75.  
584 doi: 10.1016/S0020-7519(99)00170-8.
- 585 **54.** Reischl U, Bretagne S, Krüger D, Ernault P, Costa J-M. Comparison of two DNA targets for the diagnosis of  
586 Toxoplasmosis by real-time PCR using fluorescence resonance energy transfer hybridization probes. *BMC Infect*  
587 *Dis*. 2003; 3:7. doi: 10.1186/1471-2334-3-7 PMID: 12729464.
- 588 **55.** Pinto CM, Ocaña-Mayorga S, Tapia EE, Lobos SE, Zurita AP, Aguirre-Villacís F, et al. Bats, Trypanosomes, and  
589 Triatomines in Ecuador: New Insights into the Diversity, Transmission, and Origins of *Trypanosoma cruzi* and  
590 Chagas Disease. *PLoS One*. 2015; 10:e0139999. Epub 2015/10/14. doi: 10.1371/journal.pone.0139999 PMID:  
591 26465748.
- 592 **56.** Noyes H, Stevens J, Teixeira M, Phelan J, Holz P. A nested PCR for the *ssrRNA* gene detects *Trypanosoma binneyi* in  
593 the platypus and *Trypanosoma* sp. in wombats and kangaroos in Australia. *International Journal for Parasitology*.  
594 1999; 29:331–9. doi: 10.1016/S0020-7519(98)00167-2.
- 595 **57.** Aleman A, Guerra T, Maikis TJ, Milholland MT, Castro-Arellano I, Forstner MRJ, et al. The Prevalence of  
596 *Trypanosoma cruzi*, the Causal Agent of Chagas Disease, in Texas Rodent Populations. *Ecohealth*. 2017; 14:130–43.  
597 Epub 2017/01/13. doi: 10.1007/s10393-017-1205-5 PMID: 28091763.
- 598 **58.** Murphy WJ, O'Brien SJ. Designing and optimizing comparative anchor primers for comparative gene mapping and  
599 phylogenetic inference. *Nat Protoc*. 2007; 2:3022–30. doi: 10.1038/nprot.2007.429 PMID: 18007639.
- 600 **59.** Medeiros ACR, Rodrigues SS, Roselino AMF. Comparison of the specificity of PCR and the histopathological  
601 detection of leishmania for the diagnosis of American cutaneous leishmaniasis. *Braz J Med Biol Res*. 2002; 35:421–  
602 4. doi: 10.1590/S0100-879X2002000400002 PMID: 11960189.

- 603 **60.** Sosa-Ochoa W, Morales Cortedano X, Argüello S, Zuniga C, Henríquez J, Mejía R, et al. Ecoepidemiología de la  
604 Leishmaniasis cutánea no ulcerada en Honduras. *Ciencia y Tecnología*. 2015:115–28. doi: 10.5377/rct.v0i14.1799.
- 605 **61.** Mehlhorn H. Methods to Diagnose Parasites. In: Mehlhorn H, editor. *Animal Parasites*. Cham: Springer  
606 International Publishing; 2016. pp. 23–32.
- 607 **62.** Mehlhorn H. Worms (Helminths). In: Mehlhorn H, editor. *Animal Parasites*. Cham: Springer International  
608 Publishing; 2016. pp. 251–498.
- 609 **63.** Mehlhorn H. Worms of Humans. In: Mehlhorn H, editor. *Human Parasites*. Cham: Springer International Publishing;  
610 2016. pp. 135–298.
- 611 **64.** Salfelder K, Liscano TR de, Sauerteig E. Helminthic diseases. In: Salfelder K, Liscano TR de, Sauerteig E, editors. *Atlas*  
612 *of Parasitic Pathology*. Dordrecht: Springer Netherlands; 1992. pp. 96–172.
- 613 **65.** Childs JE, Krebs JW, Real LA, Gordon ER. Animal-based national surveillance for zoonotic disease: quality,  
614 limitations, and implications of a model system for monitoring rabies. *Prev Vet Med*. 2007; 78:246–61. Epub  
615 2006/11/28. doi: 10.1016/j.prevetmed.2006.10.014 PMID: 17129622.
- 616 **66.** Moede Rogall G, Sleeman JM. *The USGS National Wildlife Health Center: Advancing wildlife and ecosystem health*.  
617 Reston, VA; 2017.
- 618 **67.** Craig Stephen. *CWHC Annual report 2019/2020*. Canada: Canadia Wildlife Health Cooperative 2020. Available  
619 from: [http://www.cwhc-rclf.ca/docs/annual\\_reports/2019\\_2020\\_CWHC\\_Annual\\_Report\\_EN.pdf?v=20201207](http://www.cwhc-rclf.ca/docs/annual_reports/2019_2020_CWHC_Annual_Report_EN.pdf?v=20201207).
- 620 **68.** Benavides Vindas S. El aporte del turismo a la economía costarricense: más de una década después. *Econom y*  
621 *Sociedad*. 2020; 25:1–29. doi: 10.15359/eyes.25-57.1.
- 622 **69.** Stitt T, Mountifield J, Stephen C. Opportunities and obstacles to collecting wildlife disease data for public health  
623 purposes: results of a pilot study on Vancouver Island, British Columbia. *Can Vet J*. 2007; 48:83-7, 89-90.  
624 doi: 10.4141/cjas68-011 PMID: 17310627.
- 625 **70.** Don Bamunusinghage Nihal P, Dangolla A, Hettiarachchi R, Abeynayake P, Stephen C. Challenges and opportunities  
626 for wildlife disease surveillance in sri lanka. *J Wildl Dis*. 2020; 56:538–46. Epub 2020/01/09. doi: 10.7589/2019-07-  
627 181 PMID: 31917632.

- 628 **71.** Terrier M. Health monitoring of wildlife in France: SAGIR network and epidemiological monitoring of chiroptera  
629 rabies. France: Académie Vétérinaire de France 2006. Available from:  
630 <https://core.ac.uk/download/pdf/15524538.pdf>.
- 631 **72.** Forster G. Evaluating the feasibility of using data and samples provided by wildlife organisations to develop a  
632 national wildlife surveillance scheme in Costa Rica. Master Thesis, University of London. 2020.
- 633 **73.** Pewsner M, Origg F, Frey J, Ryser-Degiorgis M-P. Assessing Fifty Years of General Health Surveillance of Roe Deer  
634 in Switzerland: A Retrospective Analysis of Necropsy Reports. PLoS One. 2017; 12:e0170338. Epub 1/19/2017.  
635 doi: 10.1371/journal.pone.0170338 PMID: 28103325.
- 636 **74.** Stallknecht DE. Impediments to wildlife disease surveillance, research, and diagnostics. Curr Top Microbiol  
637 Immunol. 2007; 315:445–61. doi: 10.1007/978-3-540-70962-6\_17 PMID: 17848074.
- 638 **75.** Gourlay P, Decors A, Moinet M, Lambert O, Lawson B, Beaudeau F, et al. The potential capacity of French wildlife  
639 rescue centres for wild bird disease surveillance. Eur J Wildl Res. 2014; 60:865–73. doi: 10.1007/s10344-014-0853-  
640 9.
- 641 **76.** Cox-Witton K, Reiss A, Woods R, Grillo V, Baker RT, Blyde DJ, et al. Emerging infectious diseases in free-ranging  
642 wildlife-Australian zoo based wildlife hospitals contribute to national surveillance. PLoS One. 2014; 9:e95127. Epub  
643 2014/05/01. doi: 10.1371/journal.pone.0095127 PMID: 24787430.
- 644 **77.** Balseiro A, Espí A, Márquez I, Pérez V, Ferreras MC, Marín JFG, et al. Pathological features in marine birds affected  
645 by the Prestige's oil spill in the north of Spain. J Wildl Dis. 2005; 41:371–8. doi: 10.7589/0090-3558-41.2.371 PMID:  
646 16107672.
- 647 **78.** Han BA, Kramer AM, Drake JM. Global Patterns of Zoonotic Disease in Mammals. Trends Parasitol. 2016; 32:565–  
648 77. Epub 2016/06/14. doi: 10.1016/j.pt.2016.04.007 PMID: 27316904.
- 649 **79.** Plourde BT, Burgess TL, Eskew EA, Roth TM, Stephenson N, Foley JE. Are disease reservoirs special? Taxonomic and  
650 life history characteristics. PLoS One. 2017; 12:e0180716. Epub 2017/07/13. doi: 10.1371/journal.pone.0180716  
651 PMID: 28704402.

- 652 **80.** Garcês A. A review of the mortality of wild fauna in Europe in the last century: the consequences of human  
653 activity. *Journal of Wildlife and Biodiversity*. 2020; 4:34–55. Available from: [http://www.wildlife-  
654 biodiversity.com/article\\_37220\\_2f56660d6a06c893fdf3c6aced8de4e3.pdf](http://www.wildlife-<br/>654 biodiversity.com/article_37220_2f56660d6a06c893fdf3c6aced8de4e3.pdf).
- 655 **81.** Ascensão F, Desbiez ALJ, Medici EP, Bager A. Spatial patterns of road mortality of medium–large mammals in Mato  
656 Grosso do Sul, Brazil. *Wildl Res*. 2017; 44:135. doi: 10.1071/WR16108.
- 657 **82.** Navas-Suárez P, Díaz-Delgado J, Matushima ER, Fávero CM, am Sánchez Sarmiento, Sacristán C, et al. A  
658 retrospective pathology study of two Neotropical deer species (1995-2015), Brazil: Marsh deer (*Blastocerus*  
659 *dichotomus*) and brown brocket deer (*Mazama gouazoubira*). *PLoS One*. 2018; 13:e0198670. Epub 2018/06/07.  
660 doi: 10.1371/journal.pone.0198670 PMID: 29879222.
- 661 **83.** Carvajal V. Registro de mamíferos silvestres atropellados y hábitat asociados en el cantón de la fortuna, San Carlos,  
662 Costa Rica. *Biocenosis*. 2016; 30. Available from:  
663 <https://revistas.uned.ac.cr/index.php/biocenosis/article/view/1427>.
- 664 **84.** Monge Nájera J. Vertebrate mortality on tropical highways: the costa rican case. *ida Silv. Neotrop*. 1996; 5:154–6.  
665 Available from: [https://investiga.uned.ac.cr/ecologiaurbana/wp-content/uploads/sites/30/2017/09/JMN-1996-  
666 vertebrate\\_mortality.pdf](https://investiga.uned.ac.cr/ecologiaurbana/wp-content/uploads/sites/30/2017/09/JMN-1996-<br/>666 vertebrate_mortality.pdf).
- 667 **85.** Lempp C, Jungwirth N, Grilo ML, Reckendorf A, Ulrich A, van Neer A, et al. Pathological findings in the red fox  
668 (*Vulpes vulpes*), stone marten (*Martes foina*) and raccoon dog (*Nyctereutes procyonoides*), with special emphasis  
669 on infectious and zoonotic agents in Northern Germany. *PLoS One*. 2017; 12:e0175469. Epub 2017/04/11.  
670 doi: 10.1371/journal.pone.0175469 PMID: 28399176.
- 671 **86.** Navas-Suárez PE, Díaz-Delgado J, Fernandes-Santos RC, Testa-José C, Silva R, Sansone M, et al. Pathological  
672 Findings in Lowland Tapirs (*Tapirus terrestris*) Killed by Motor Vehicle Collision in the Brazilian Cerrado. *J Comp*  
673 *Pathol*. 2019; 170:34–45. Epub 2019/06/12. doi: 10.1016/j.jcpa.2019.05.004 PMID: 31375157.
- 674 **87.** Navas-Suárez PE, Sacristán C, Díaz-Delgado J, Yogui DR, Alves MH, Fuentes-Castillo D, et al. Pulmonary  
675 adiaspiromycosis in armadillos killed by motor vehicle collisions in Brazil. *Sci Rep*. 2021; 11:272. Epub 2021/01/11.  
676 doi: 10.1038/s41598-020-79521-6 PMID: 33432031.

- 677 **88.** Navas-Suárez P. Características e possíveis fatores de risco em cervos neotropicais com histórico de trauma e  
678 encaminhados ao Laboratório de Patologia Comparada de Animais Selvagens – LAPCOM, FMVZ, USP, Brasil.  
679 Revista de Educação Continuada em Medicina Veterinária e Zootecnia do CRMV-SP. 2016; 14:51–2. Available from:  
680 <https://www.revistamvez-crmvsp.com.br/index.php/recmvz/article/view/31101>.
- 681 **89.** Nettles VF, Quist CF, Lopez RR, Wilmers TJ, Frank P, Roberts W, et al. Morbidity and mortality factors in key deer  
682 (*Odocoileus virginianus clavium*). *J Wildl Dis.* 2002; 38:685–92. doi: 10.7589/0090-3558-38.4.685 PMID: 12528433.
- 683 **90.** Calero-Bernal R, Pérez-Martín JE, Reina D, Serrano FJ, Frontera E, Fuentes I, et al. Detection of Zoonotic Protozoa  
684 *Toxoplasma gondii* and *Sarcocystis suis* in Wild Boars from Spain. *Zoonoses Public Health.* 2016; 63:346–50.  
685 Epub 2015/11/25. doi: 10.1111/zph.12243 PMID: 26604045.
- 686 **91.** Cantlay JC, Ingram DJ, Meredith AL. A Review of Zoonotic Infection Risks Associated with the Wild Meat Trade in  
687 Malaysia. *Ecohealth.* 2017; 14:361–88. Epub 2017/03/22. doi: 10.1007/s10393-017-1229-x PMID: 28332127.
- 688 **92.** Karesh WB, Noble E. The bushmeat trade: increased opportunities for transmission of zoonotic disease. *Mt Sinai J*  
689 *Med.* 2009; 76:429–34. doi: 10.1002/msj.20139 PMID: 19787649.
- 690 **93.** Milton AAP, Agarwal RK, Bhuvana Priya G, Saminathan M, Aravind M, Reddy A, et al. Prevalence and molecular  
691 typing of *Clostridium perfringens* in captive wildlife in India. *Anaerobe.* 2017; 44:55–7. Epub 2017/02/01.  
692 doi: 10.1016/j.anaerobe.2017.01.011 PMID: 28159707.
- 693 **94.** Rodriguez-Villar S, Fife A, Baldwin C, Warne RR. Antibiotic-resistant hypervirulent *Klebsiella pneumoniae* causing  
694 community- acquired liver abscess: an emerging disease. *Oxf Med Case Reports.* 2019; 2019:omz032. Epub  
695 2019/05/31. doi: 10.1093/omcr/omz032 PMID: 31198568.
- 696 **95.** Greig J, Rajić A, Young I, Mascarenhas M, Waddell L, LeJeune J. A scoping review of the role of wildlife in the  
697 transmission of bacterial pathogens and antimicrobial resistance to the food Chain. *Zoonoses Public Health.* 2015;  
698 62:269–84. Epub 2014/08/30. doi: 10.1111/zph.12147 PMID: 25175882.
- 699 **96.** Heaton CJ, Gerbig GR, Sensius LD, Patel V, Smith TC. *Staphylococcus aureus* Epidemiology in Wildlife: A Systematic  
700 Review. *Antibiotics (Basel).* 2020; 9. Epub 2020/02/18. doi: 10.3390/antibiotics9020089 PMID: 32085586.

- 701 **97.** Mulani MS, Kamble EE, Kumkar SN, Tawre MS, Pardesi KR. Emerging Strategies to Combat ESKAPE Pathogens in the  
702 Era of Antimicrobial Resistance: A Review. *Front Microbiol.* 2019; 10:539. Epub 2019/04/01.  
703 doi: 10.3389/fmicb.2019.00539 PMID: 30988669.
- 704 **98.** Tacconelli E, Carrara E, Savoldi A, Harbarth S, Mendelson M, Monnet DL, et al. Discovery, research, and  
705 development of new antibiotics: the WHO priority list of antibiotic-resistant bacteria and tuberculosis. *The Lancet*  
706 *Infectious Diseases.* 2018; 18:318–27. doi: 10.1016/S1473-3099(17)30753-3.
- 707 **99.** Blanco-Peña K, Esperón F, Torres-Mejía AM, La Torre A de, La Cruz E de, Jiménez-Soto M. Antimicrobial Resistance  
708 Genes in Pigeons from Public Parks in Costa Rica. *Zoonoses Public Health.* 2017; 64:e23-e30. Epub 2017/02/24.  
709 doi: 10.1111/zph.12340 PMID: 28233464.
- 710 **100.** Hongoh V, Hoen AG, Aenishaenslin C, Waaub J-P, Bélanger D, Michel P. Spatially explicit multi-criteria decision  
711 analysis for managing vector-borne diseases. *Int J Health Geogr.* 2011; 10:70. Epub 2011/12/29.  
712 doi: 10.1186/1476-072X-10-70 PMID: 22206355.
- 713 **101.** Grillet ME, Hernández-Villena JV, Llewellyn MS, Paniz-Mondolfi AE, Tami A, Vincenti-Gonzalez MF, et al.  
714 Venezuela's humanitarian crisis, resurgence of vector-borne diseases, and implications for spillover in the region.  
715 *The Lancet Infectious Diseases.* 2019; 19:e149-e161. doi: 10.1016/S1473-3099(18)30757-6.
- 716 **102.** World Health Organization. A global brief on vector-borne diseases. Switzerland: WHO 2014. Available from:  
717 [https://apps.who.int/iris/bitstream/handle/10665/111008/WHO\\_DCO\\_WHD\\_2014.1\\_eng.pdf](https://apps.who.int/iris/bitstream/handle/10665/111008/WHO_DCO_WHD_2014.1_eng.pdf).
- 718 **103.** Dujardin J-C, Herrera S, do Rosario V, Arevalo J, Boelaert M, Carrasco HJ, et al. Research priorities for neglected  
719 infectious diseases in Latin America and the Caribbean region. *PLoS Negl Trop Dis.* 2010; 4:e780. Epub 2010/10/26.  
720 doi: 10.1371/journal.pntd.0000780 PMID: 21049009.
- 721 **104.** Montenegro VM, Bonilla MC, Kaminsky D, Romero-Zúñiga JJ, Siebert S, Krämer F. Serological detection of  
722 antibodies to *Anaplasma* spp., *Borrelia burgdorferi* sensu lato and *Ehrlichia canis* and of *Dirofilaria immitis* antigen  
723 in dogs from Costa Rica. *Vet Parasitol.* 2017; 236:97–107. Epub 2017/02/14. doi: 10.1016/j.vetpar.2017.02.009  
724 PMID: 28288773.

- 725 **105.** Rojas A, Rojas D, Montenegro VM, Baneth G. Detection of *Dirofilaria immitis* and other arthropod-borne filarioids  
726 by an HRM real-time qPCR, blood-concentrating techniques and a serological assay in dogs from Costa Rica. *Parasit*  
727 *Vectors*. 2015; 8:170. Epub 2015/03/23. doi: 10.1186/s13071-015-0783-8 PMID: 25851920.
- 728 **106.** Brenes R, Beaver PC, Monge E, Zamora L. Pulmonary dirofilariasis in a Costa Rican man. *Am J Trop Med Hyg*. 1985;  
729 34:1142–3. doi: 10.4269/ajtmh.1985.34.1142 PMID: 3834799.
- 730 **107.** Rodríguez B, Arroyo R, Caro L, Orihel TC. Human dirofilariasis in Costa Rica. A report of three new cases of  
731 *Dirofilaria immitis* infection. *Parasite*. 2002; 9:193–5.
- 732 **108.** Olivo CA, Gundacker ND, Murillo J, Weiss SD, Suarez D, Suarez JA. Subcutaneous Dirofilariasis in a Returning  
733 Traveler From Costa Rica. *Infect Dis Clin Pract*. 2019; 27:58–60. doi: 10.1097/IPC.0000000000000679.
- 734 **109.** Segura NA, Muñoz AL, Losada-Barragán M, Torres O, Rodríguez AK, Rangel H, et al. Minireview: Epidemiological  
735 impact of arboviral diseases in Latin American countries, arbovirus-vector interactions and control strategies.  
736 *Pathog Dis*. 2021; 79. doi: 10.1093/femspd/ftab043 PMID: 34410378.
- 737 **110.** Calderón-Arguedas O, Troyo A, Solano ME, Avendaño A, Beier JC. Urban mosquito species (Diptera: Culicidae) of  
738 dengue endemic communities in the Greater Puntarenas area, Costa Rica. *Rev Biol Trop*. 2009; 57:1223–34.  
739 doi: 10.15517/rbt.v57i4.5459 PMID: 20073347.
- 740 **111.** León B, Käsbohrer A, Hutter SE, Baldi M, Firth CL, Romero-Zúñiga JJ, et al. National Seroprevalence and Risk Factors  
741 for Eastern Equine Encephalitis and Venezuelan Equine Encephalitis in Costa Rica. *J Equine Vet Sci*. 2020;  
742 92:103140. Epub 2020/06/02. doi: 10.1016/j.jevs.2020.103140 PMID: 32797803.
- 743 **112.** Johnson G, Nemeth N, Hale K, Lindsey N, Panella N, Komar N. Surveillance for West Nile virus in American white  
744 pelicans, Montana, USA, 2006–2007. *Emerging Infect Dis*. 2010; 16:406–11. doi: 10.3201/eid1603.090559 PMID:  
745 20202414.
- 746 **113.** Johnson G, Panella N, Hale K, Komar N. Detection of West Nile virus in stable flies (Diptera: Muscidae) parasitizing  
747 juvenile American white pelicans. *J Med Entomol*. 2010; 47:1205–11. doi: 10.1603/ME10002 PMID: 21175073.

- 748 **114.** Kennedy JM, Earle JAP, Omar S, Abdullah H, Nielsen O, Roelke-Parker ME, et al. Canine and Phocine Distemper  
749 Viruses: Global Spread and Genetic Basis of Jumping Species Barriers. *Viruses*. 2019; 11. Epub 2019/10/14.  
750 doi: 10.3390/v111100944 PMID: 31615092.
- 751 **115.** Duque-Valencia J, Sarute N, Olarte-Castillo XA, Ruíz-Sáenz J. Evolution and Interspecies Transmission of Canine  
752 Distemper Virus-An Outlook of the Diverse Evolutionary Landscapes of a Multi-Host Virus. *Viruses*. 2019; 11. Epub  
753 2019/06/26. doi: 10.3390/v11070582 PMID: 31247987.
- 754 **116.** Rendon-Marin S, Martinez-Gutierrez M, Suarez JA, Ruiz-Saenz J. Canine Distemper Virus (CDV) Transit Through the  
755 Americas: Need to Assess the Impact of CDV Infection on Species Conservation. *Front Microbiol*. 2020; 11:810.  
756 Epub 2020/05/21. doi: 10.3389/fmicb.2020.00810 PMID: 32508760.
- 757 **117.** Piche M, Alfaro A, Jiménez-Soto M, Murcia P, Jiménez C. Caracterización molecular de dos brotes de distemper  
758 canino en animales de vida silvestre en Costa Rica. *Ciencias Veterinarias*. 2019; 36:38. doi: 10.15359/rcv.36-3.27.
- 759 **118.** Kapil S, Yeary TJ. Canine distemper spillover in domestic dogs from urban wildlife. *Vet Clin North Am Small Anim*  
760 *Pract*. 2011; 41:1069–86. doi: 10.1016/j.cvsm.2011.08.005 PMID: 22041204.
- 761 **119.** Viana M, Cleaveland S, Matthiopoulos J, Halliday J, Packer C, Craft ME, et al. Dynamics of a morbillivirus at the  
762 domestic-wildlife interface: Canine distemper virus in domestic dogs and lions. *Proc Natl Acad Sci U S A*. 2015;  
763 112:1464–9. Epub 2015/01/20. doi: 10.1073/pnas.1411623112 PMID: 25605919.
- 764 **120.** Beineke A, Baumgärtner W, Wohlsein P. Cross-species transmission of canine distemper virus-an update. *One*  
765 *Health*. 2015; 1:49–59. Epub 2015/09/13. doi: 10.1016/j.onehlt.2015.09.002 PMID: 28616465.
- 766 **121.** Badilla X, Pérez-Herra V, Quirós L, Morice A, Jiménez E, Sáenz E, et al. Human rabies: a reemerging disease in Costa  
767 Rica. *Emerging Infect Dis*. 2003; 9:721–3. doi: 10.3201/eid0906.020632 PMID: 12781014.
- 768 **122.** Herrera I, Khan SR, Kaleta EF, Müller H, Dolz G, Neumann U. Serological status for *Chlamydophila psittaci*,  
769 Newcastle disease virus, avian polyoma virus, and Pacheco disease virus in scarlet macaws (*Ara macao*) kept in  
770 captivity in Costa Rica. *J Vet Med B Infect Dis Vet Public Health*. 2001; 48:721–6. doi: 10.1046/j.1439-  
771 0450.2001.00485.x PMID: 11846016.



- 772 **123.** Hernandez SM, Peters VE, Weygandt PL, Jimenez C, Villegas P, O'Connor B, et al. Do shade-grown coffee  
773 plantations pose a disease risk for wild birds. *Ecohealth*. 2013; 10:145–58. Epub 2013/05/02. doi: 10.1007/s10393-  
774 013-0837-3 PMID: 23636482.
- 775 **124.** Moreno-Díaz M-L, Alfaro E. Valoración socioeconómica del impacto de la variabilidad climática sobre la pesca  
776 artesanal en Costa Rica. *RU*. 2018; 32:18. doi: 10.15359/ru.32-1.2.
- 777 **125.** Choc-M LF, Jiménez-R A, Arguedas-C D, Dolz G. *Contraecum multipapillatum* (Nematoda: Anisakidae) en peces  
778 de aguas continentales de Guanacaste, Costa Rica e Izabal, Guatemala. *Rev Colombiana Cienc Anim RECIA*.  
779 2020:e767. doi: 10.24188/recia.v12.n2.2020.767.
- 780 **126.** Mesén Ramírez P, Calvo Fonseca N. Diagnóstico de la Angiostrongilosis abdominal en Costa Rica. Costa Rica:  
781 Instituto Costarricense de Investigación y Enseñanza en Nutrición y Salud 2010. Available from:  
782 [https://www.inciensa.sa.cr/vigilancia\\_epidemiologica/informes\\_vigilancia/2010/Parasitologia/Informe%20diagnostico%20Angiostrongilosis%202010.pdf](https://www.inciensa.sa.cr/vigilancia_epidemiologica/informes_vigilancia/2010/Parasitologia/Informe%20diagnostico%20Angiostrongilosis%202010.pdf).  
783
- 784 **127.** Vargas M. Informe técnico Evaluación de test de Morera según resultados del Centro Nacional de Referencia de  
785 Parasitología- Inciensa. Costa Rica enero 2012 - abril 2020. Costa Rica: Instituto Costarricense de Investigación y  
786 Enseñanza en Nutrición y Salud. 2020. Available from:  
787 [https://www.inciensa.sa.cr/vigilancia\\_epidemiologica/informes\\_vigilancia/2020/CNR%20Parasitologia/Informe%20Tecnico%20A.%20costarricensis.pdf](https://www.inciensa.sa.cr/vigilancia_epidemiologica/informes_vigilancia/2020/CNR%20Parasitologia/Informe%20Tecnico%20A.%20costarricensis.pdf).  
788
- 789 **128.** Santoro M, Alfaro-Alarcón A, Veneziano V, Cerrone A, Latrofa MS, Otranto D, et al. The white-nosed coati (*Nasua*  
790 *narica*) is a naturally susceptible definitive host for the zoonotic nematode *Angiostrongylus costaricensis* in Costa  
791 Rica. *Vet Parasitol*. 2016; 228:93–5. Epub 2016/08/26. doi: 10.1016/j.vetpar.2016.08.017 PMID: 27692339.
- 792 **129.** Stunkard. H. W. New intermediate hosts in the life cycle of *prosthenoorchis elegans* (diesing, 1851), an  
793 acanthocephalan parasite of primates. *J Parasitol*. 1965; 51:645–9.
- 794 **130.** Mathison BA, Bishop HS, Sanborn CR, Dos Santos Souza S, Bradbury R. *Macracanthorhynchus ingens* Infection in an  
795 18-Month-Old Child in Florida: A Case Report and Review of Acanthocephaliasis in Humans. *Clin Infect Dis*. 2016;  
796 63:1357–9. Epub 2016/08/07. doi: 10.1093/cid/ciw543 PMID: 27501844.

- 797 **131.** Lipkin WI. The changing face of pathogen discovery and surveillance. *Nat Rev Microbiol.* 2013; 11:133–41. Epub  
798 2013/01/03. doi: 10.1038/nrmicro2949 PMID: 23268232.
- 799 **132.** Gardy JL, Loman NJ. Towards a genomics-informed, real-time, global pathogen surveillance system. *Nat Rev Genet.*  
800 2018; 19:9–20. Epub 2017/11/13. doi: 10.1038/nrg.2017.88. PMID: 29129921.
- 801 **133.** Mishra N, Fagbo SF, Alagaili AN, Nitido A, Williams SH, Ng J, et al. A viral metagenomic survey identifies known and  
802 novel mammalian viruses in bats from Saudi Arabia. *PLoS One.* 2019; 14:e0214227. Epub 2019/04/10.  
803 doi: 10.1371/journal.pone.0214227. PMID: 30969980.
- 804 **134.** Gu W, Deng X, Lee M, Sucu YD, Arevalo S, Stryke D, et al. Rapid pathogen detection by metagenomic next-  
805 generation sequencing of infected body fluids. *Nat Med.* 2021; 27:115–24. Epub 2020/11/09. doi: 10.1038/s41591-  
806 020-1105-z PMID: 33169017.

## 807 **Supporting information**

808 **S1 Fig. Geographical distribution of the analyzed specimens and number of individuals by taxon.**

809 **S2 Table. Biological data and more representative pathological findings of the analyzed specimens.**



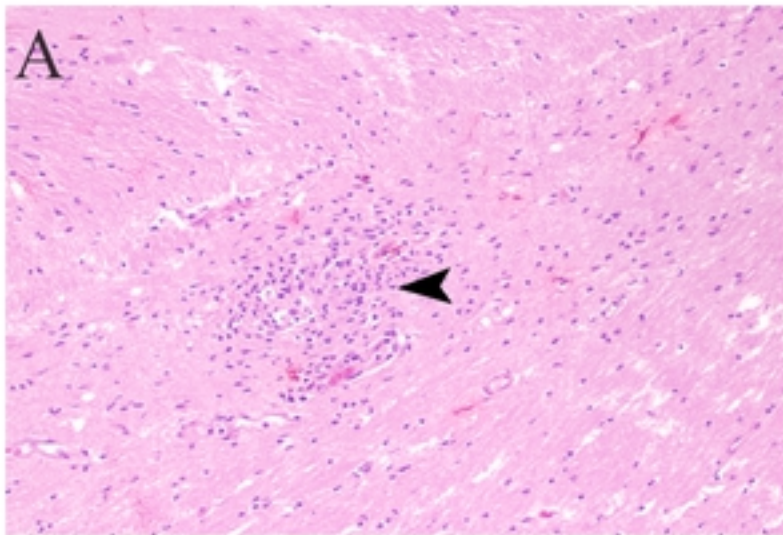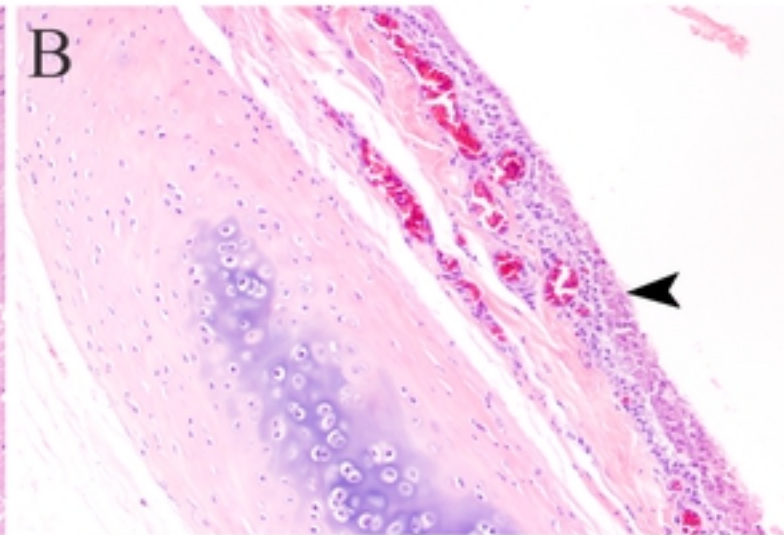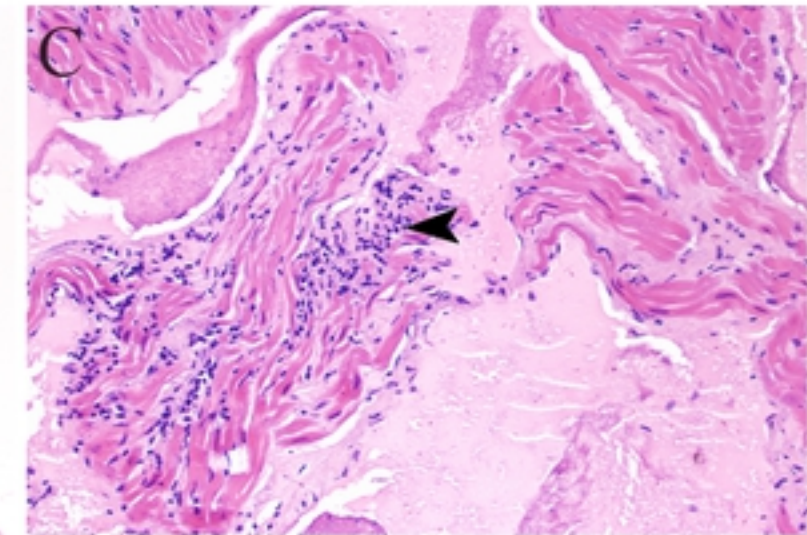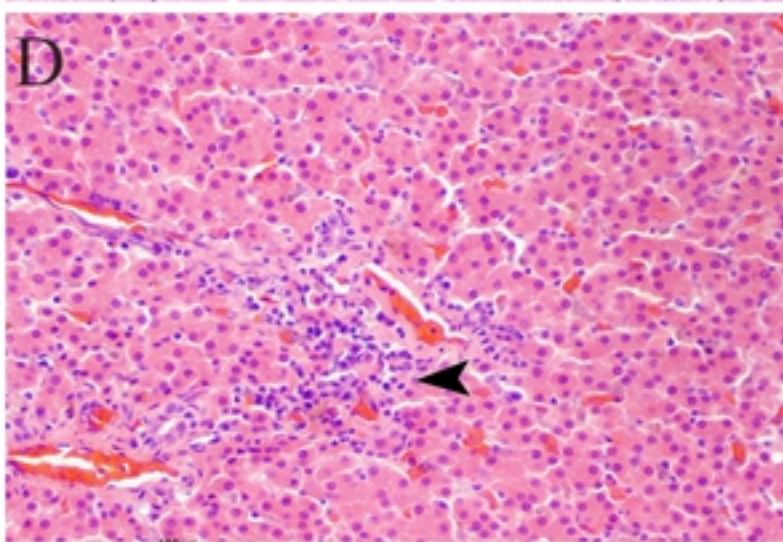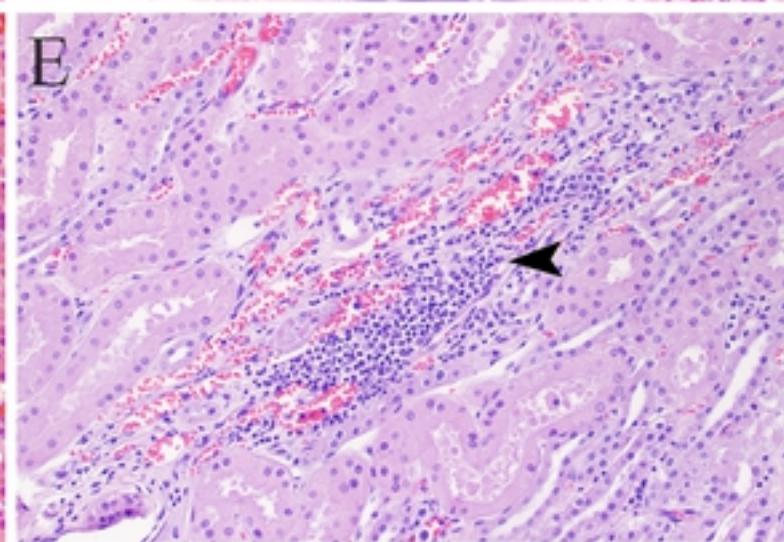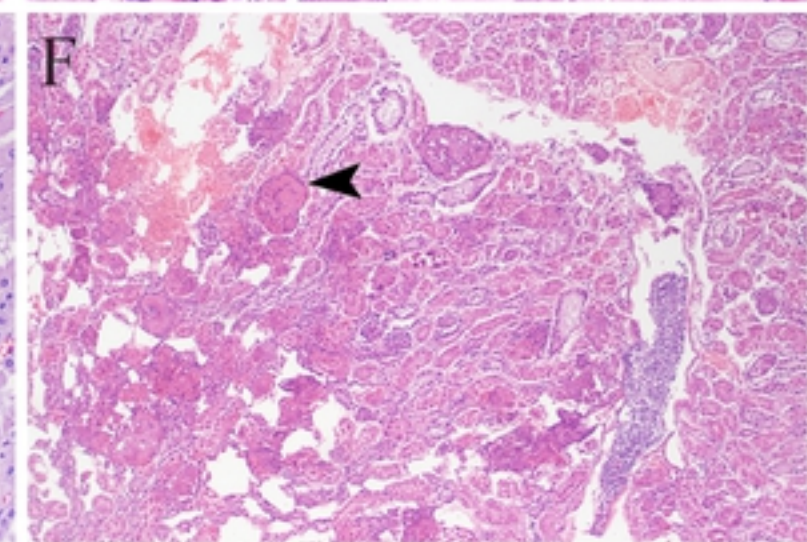

Figure



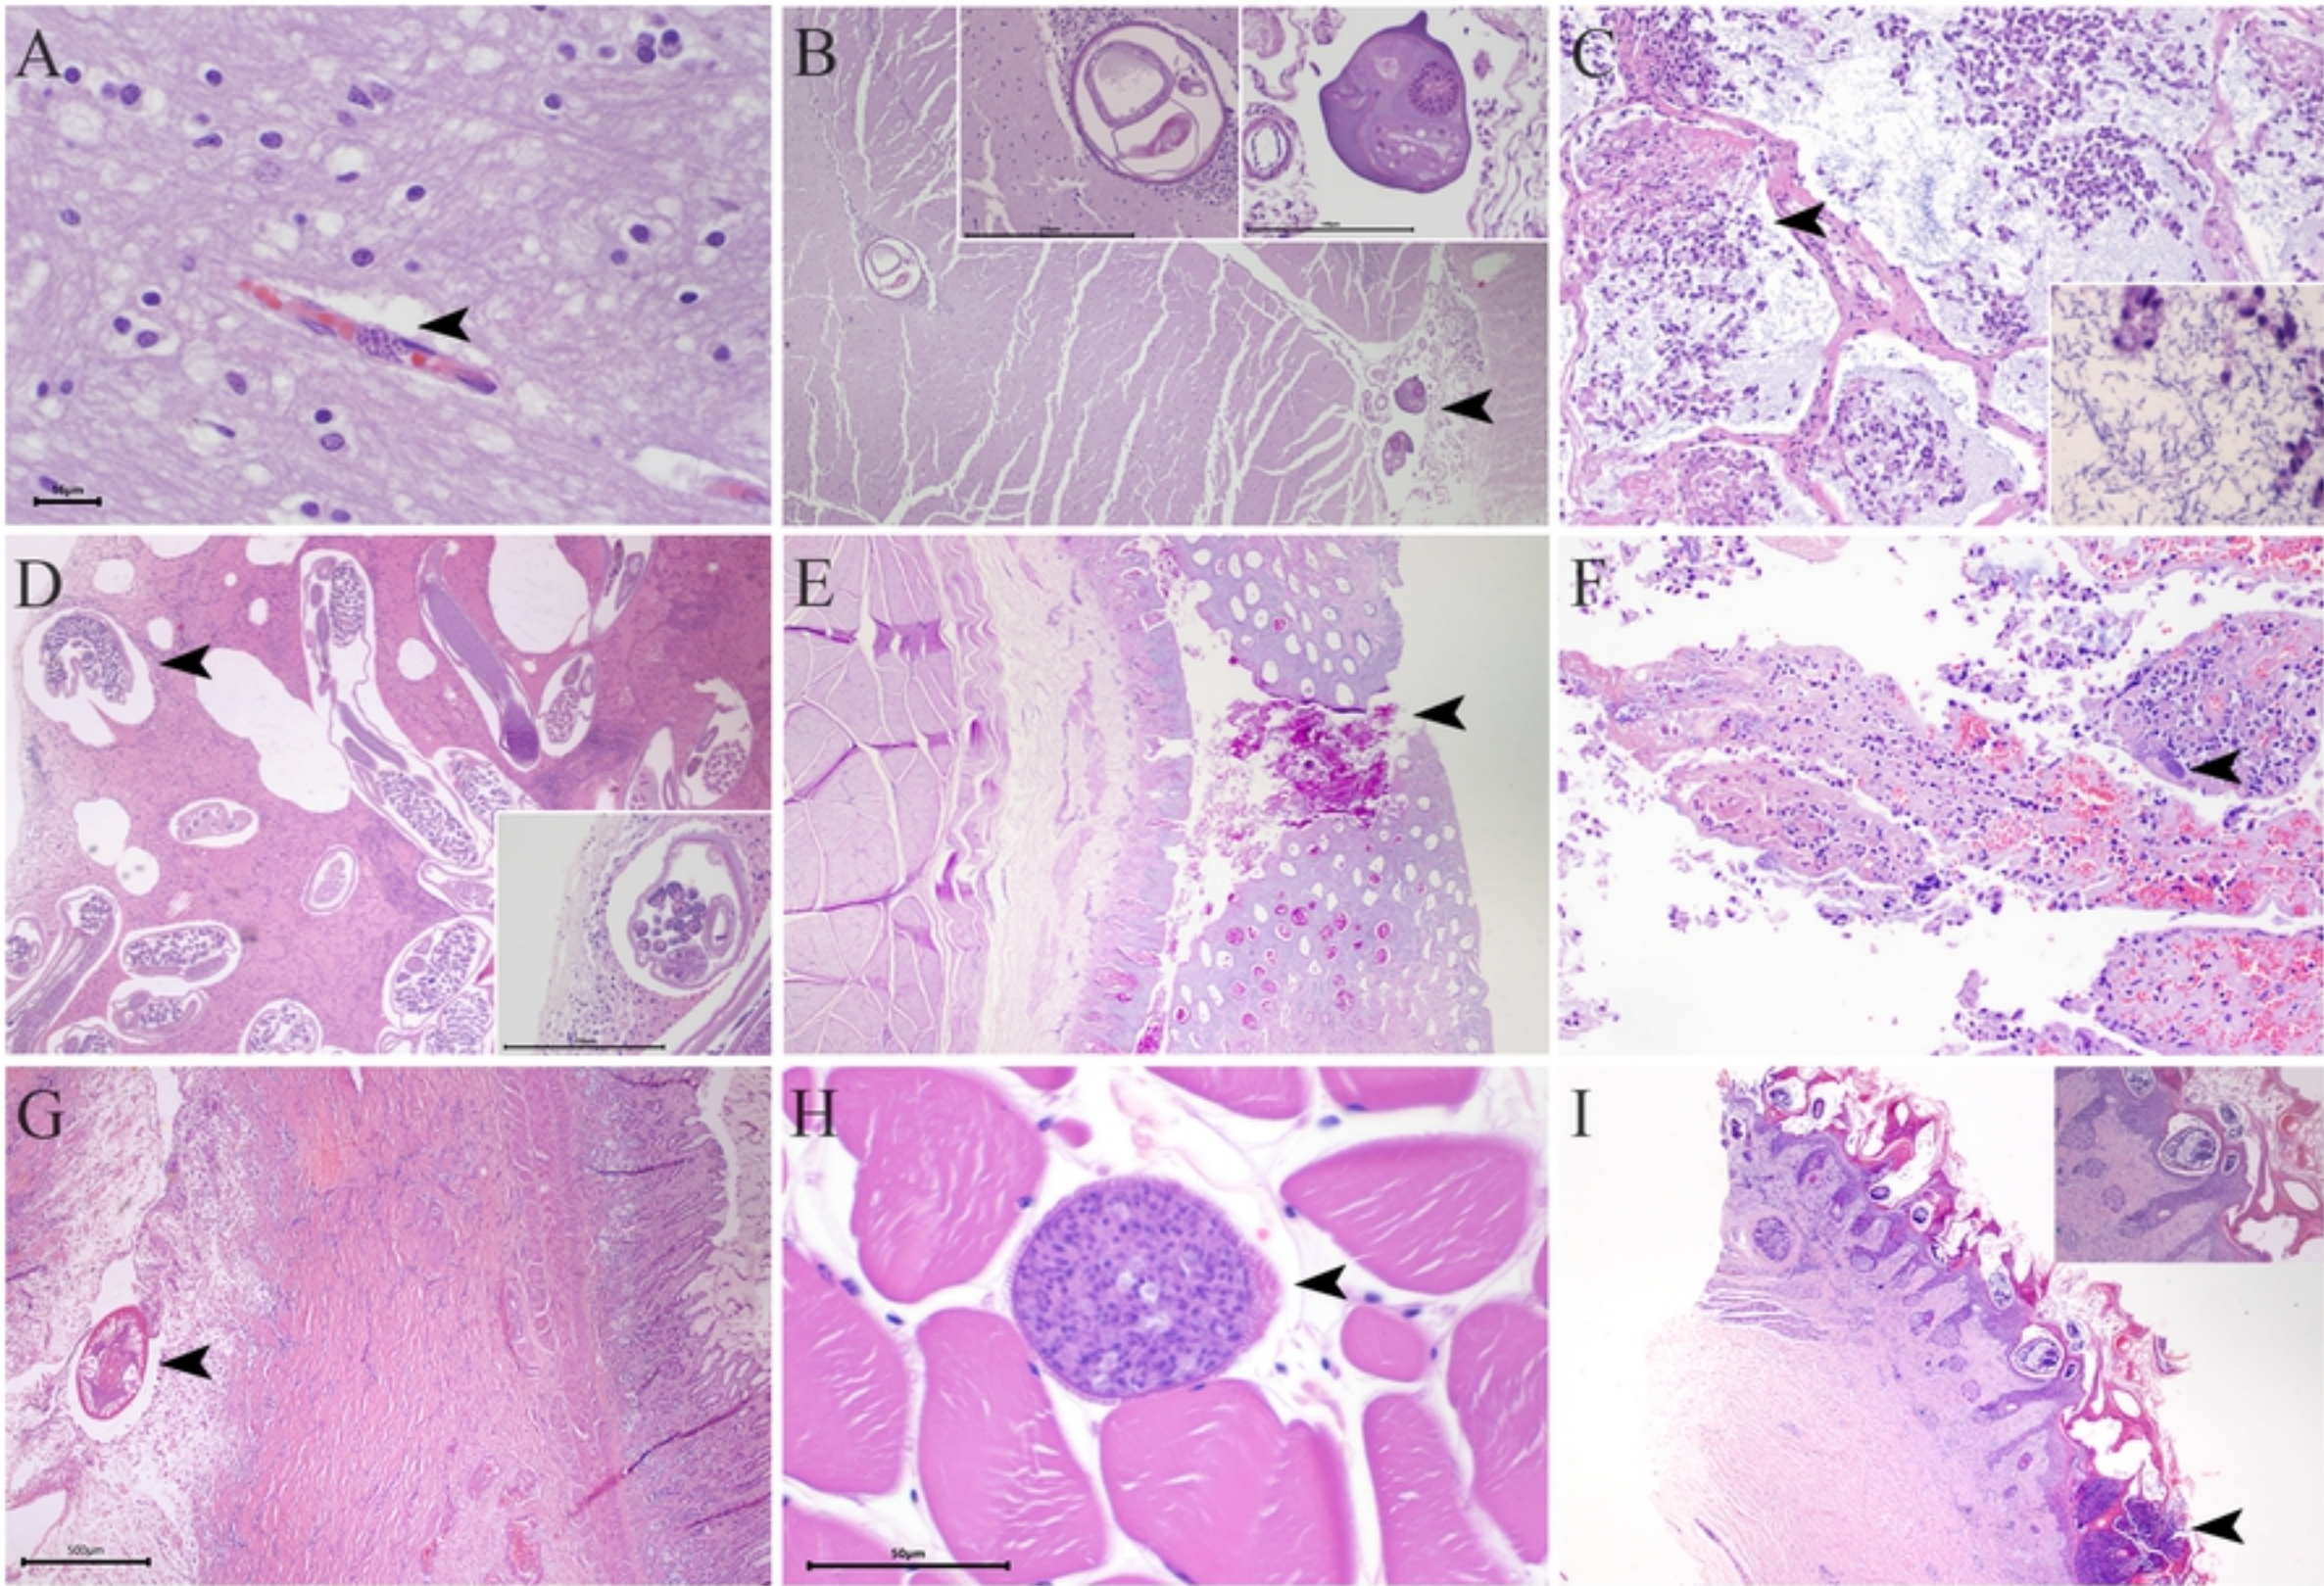

Figure



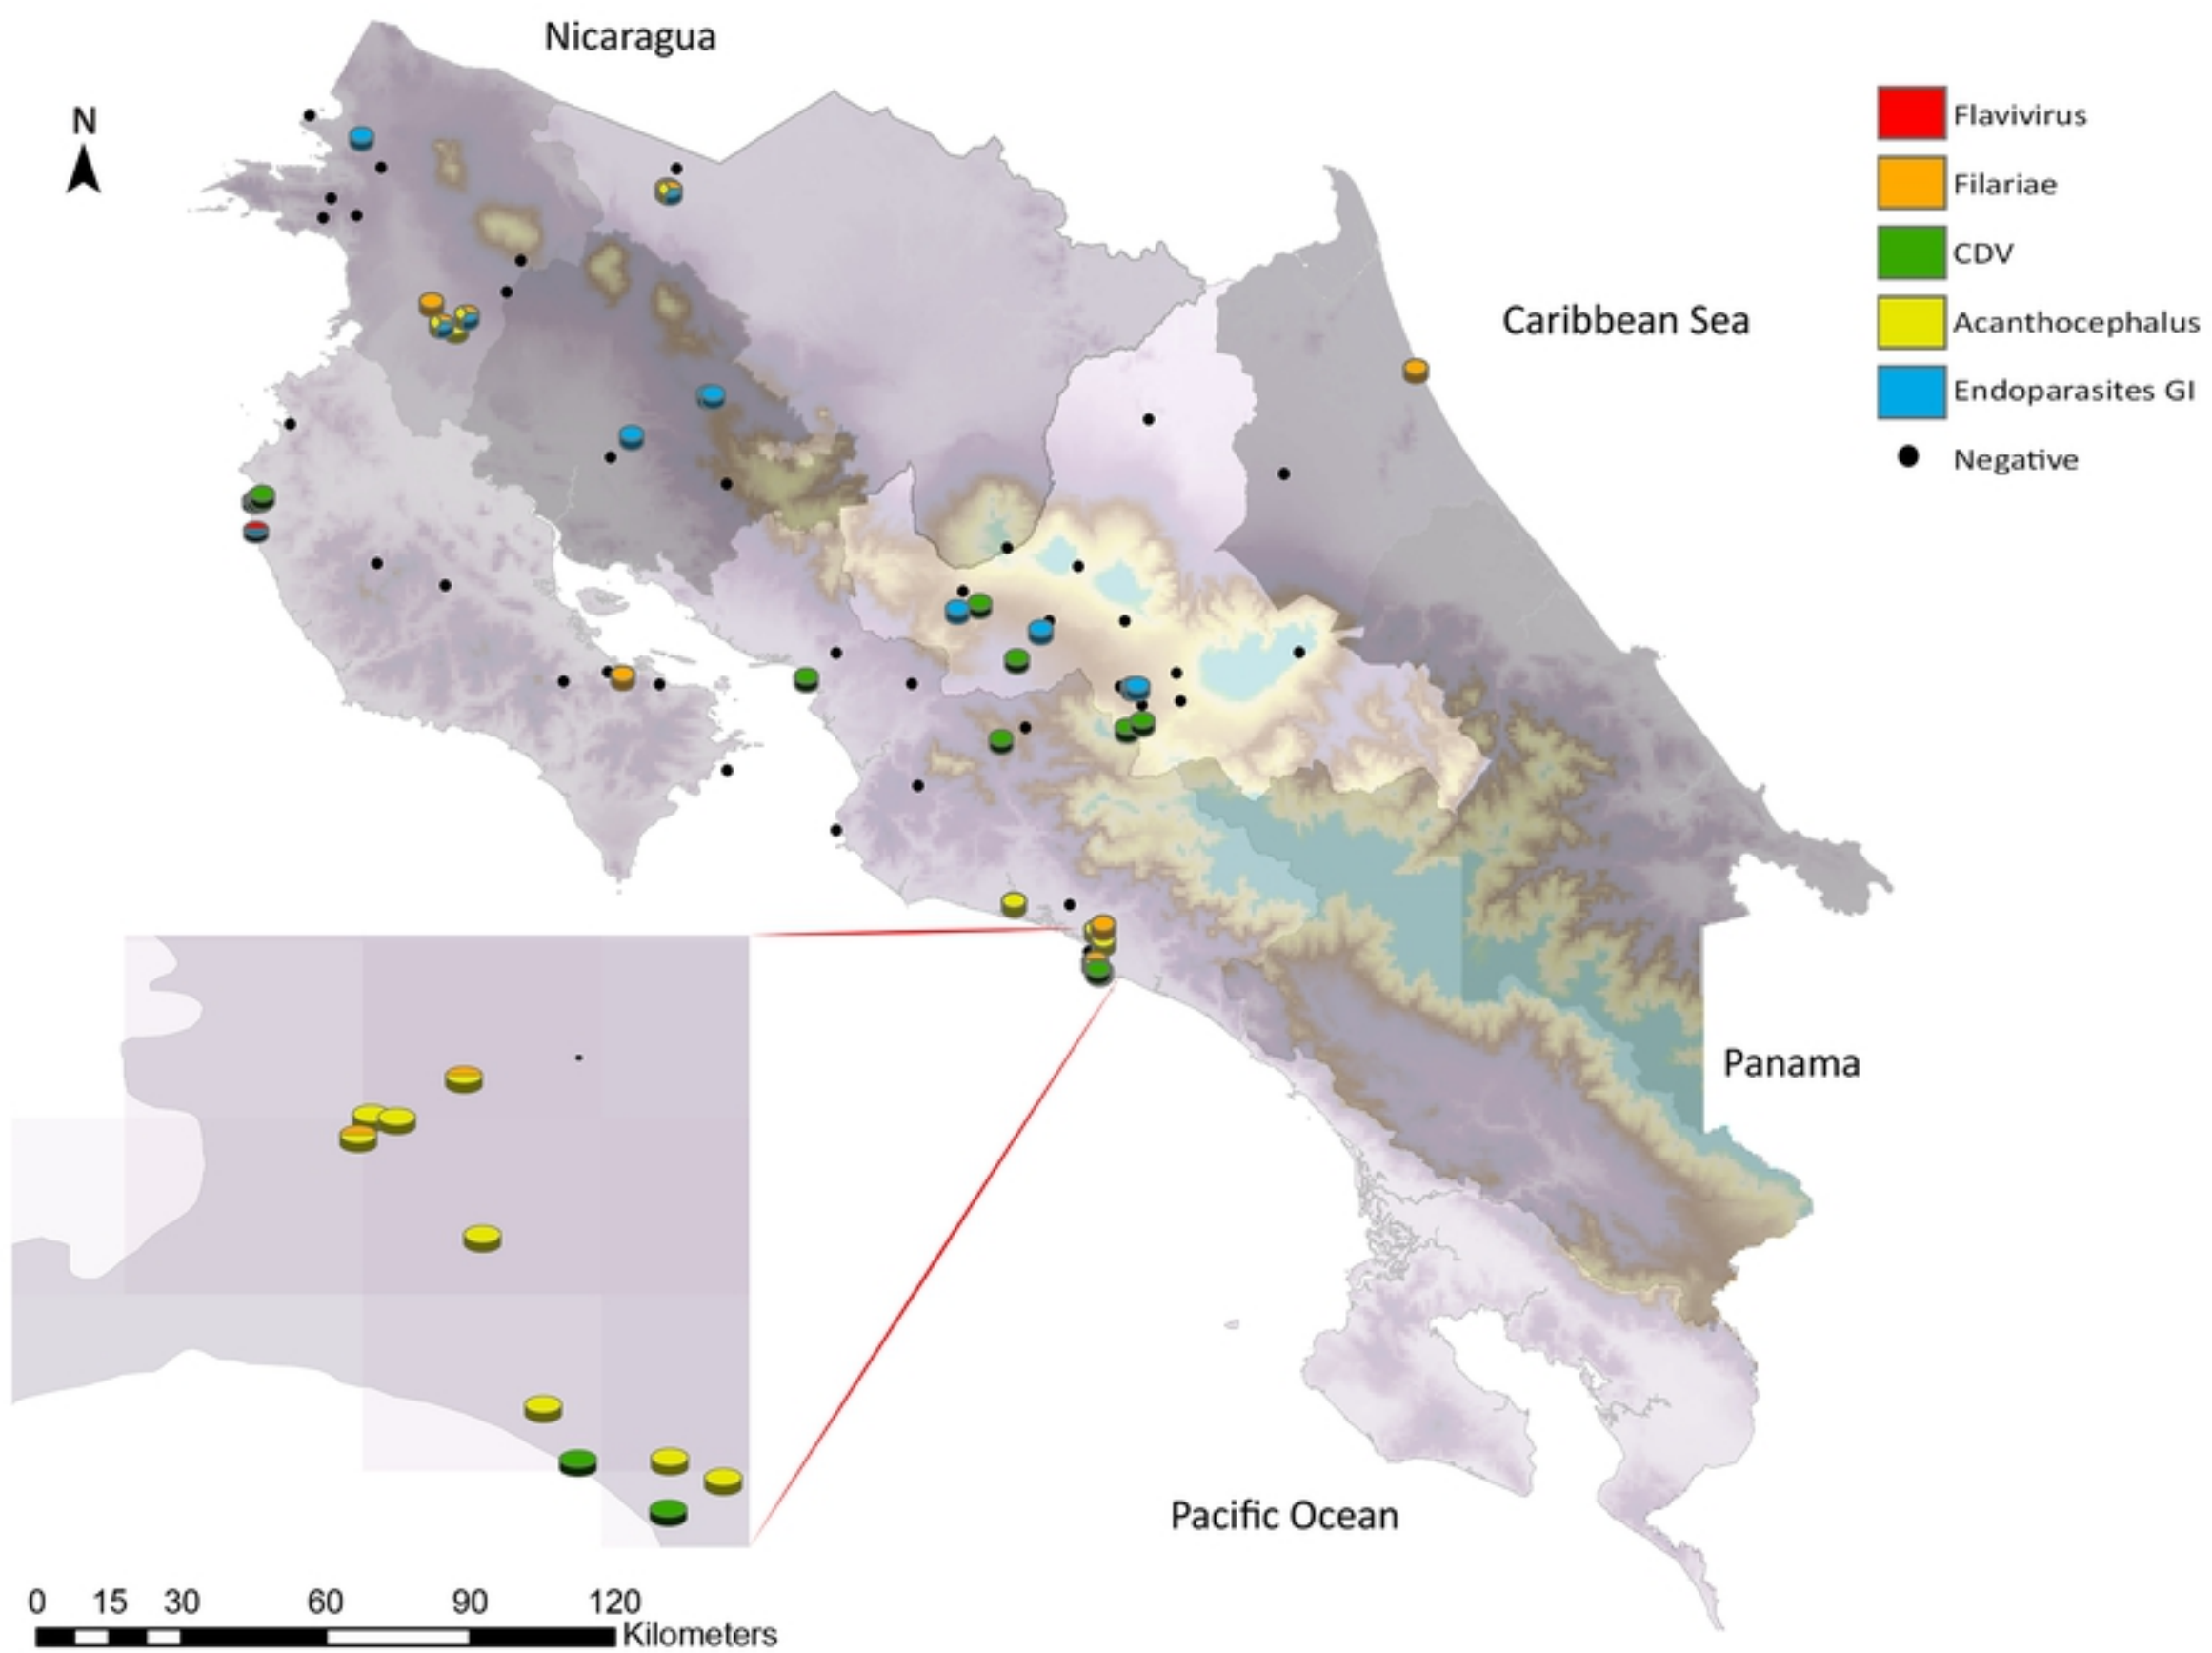

Figure
